# Supplementary material for: Synthesis, characterization and biological evaluation of cationic porphyrin–terpyridine derivatives
Source: Royal Society of Chemistry journal article supplement (doi:10.1039/c6ra25373c), 2016-01-01
Supplement: c6ra25373c1.pdf [file c6ra25373c1.pdf]

## Supporting Information

### Synthesis, characterization and biological evaluation of cationic porphyrin-terpyridine derivatives

Nuno M. M. Moura,<sup>\*a,b</sup> Catarina Ramos,<sup>c</sup> Inês Linhares,<sup>d</sup> Sérgio M. Santos,<sup>e</sup> M. Amparo F. Faustino,<sup>\*a</sup> Adelaide Almeida,<sup>d</sup> José A. S. Cavaleiro,<sup>a</sup> Francisco M. L. Amado,<sup>c</sup> Carlos Lodeiro,<sup>b</sup> M. Graça, P. M. S. Neves<sup>\*a</sup>

<sup>[a]</sup> Department of Chemistry and QOPNA, University of Aveiro, Campus de Santiago, 3810-193 Aveiro (Portugal). E-mail: [nmoura@ua.pt](mailto:nmoura@ua.pt), [faustino@ua.pt](mailto:faustino@ua.pt) and [gneves@ua.pt](mailto:gneves@ua.pt)

<sup>[b]</sup> BIOSCOPE Group, REQUIMTE, Chemistry Department Faculty of Science and Technology, University NOVA of Lisbon 2829-516, Monte da Caparica (Portugal).

<sup>[c]</sup> Mass Spectrometry Laboratory, QOPNA, Department of Chemistry, University of Aveiro, 3810-193 Aveiro (Portugal).

<sup>[d]</sup> Department of Biology and CESAM, University of Aveiro, 3810-193 Aveiro, Portugal.

<sup>[e]</sup> Department of Chemistry and CICECO, University of Aveiro, Campus de Santiago, 3810-193 Aveiro (Portugal).

<sup>[f]</sup> ProteoMass Scientific Society, Madan Parque, Rua dos Inventores, 2825-182, Caparica, Portugal.

### Table of Contents

|                                                                      |     |
|----------------------------------------------------------------------|-----|
| <b>I - Mechanistic pathway for the synthesis of compound 4</b> ..... | S2  |
| <b>II - <sup>1</sup>H, <sup>13</sup>C NMR and HRMS spectra</b> ..... | S3  |
| <b>III – Biological assays</b> .....                                 | S38 |

# I - Mechanistic pathway for the synthesis of compound 4.

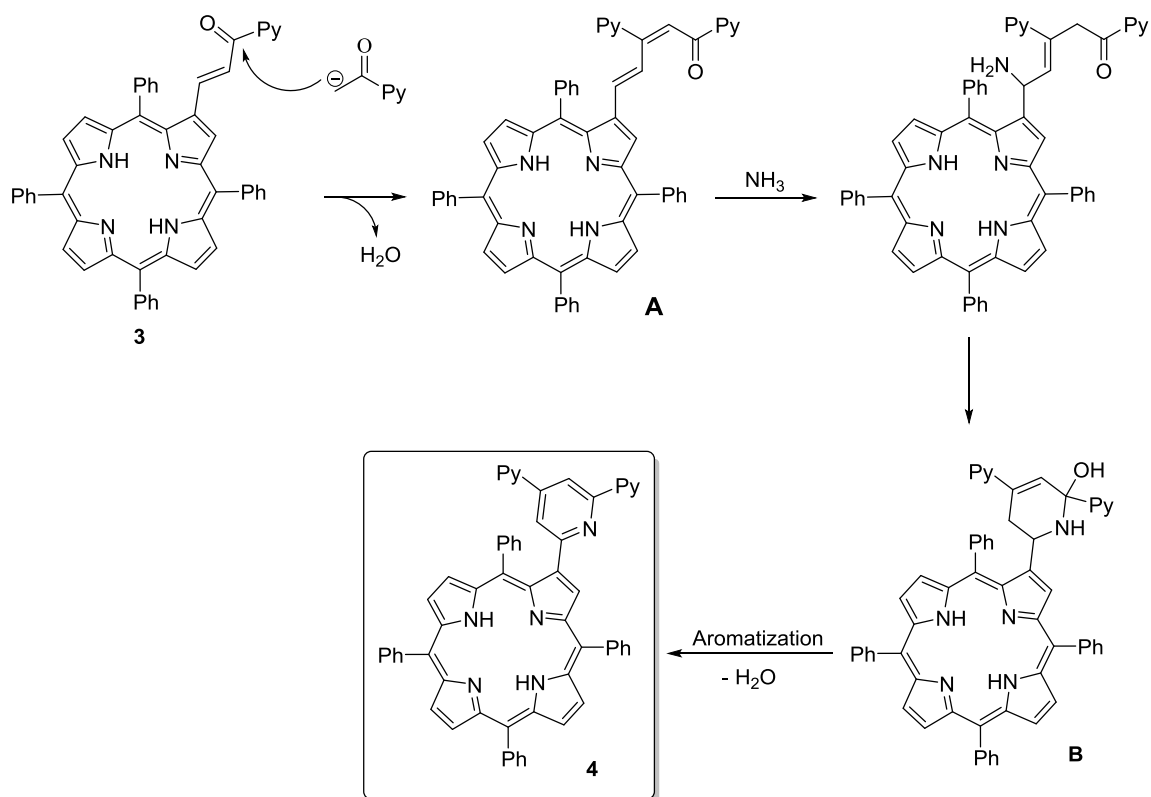

Scheme S1. Mechanistic pathway for the synthesis of compound 4.



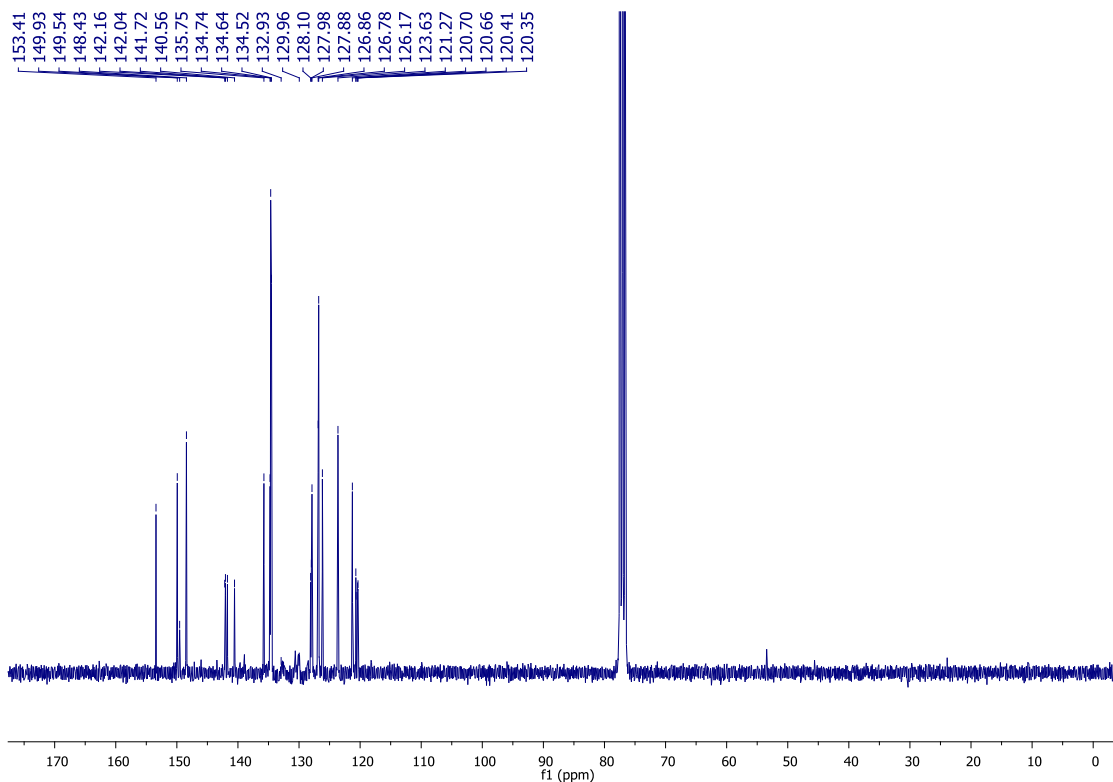

Figure S3.  $^{13}\text{C}$  NMR spectrum of compound **1b** in  $\text{CDCl}_3$ .

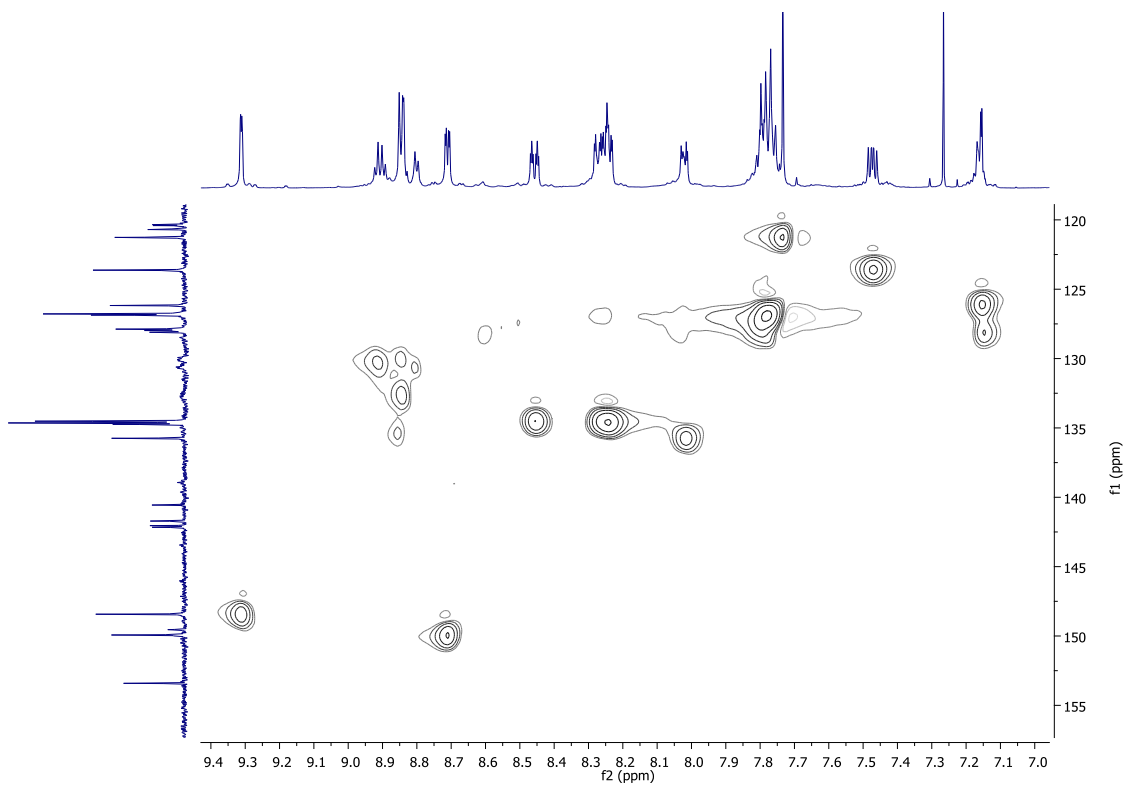

Figure S4. Partial HSQC ( $^1\text{H}/^{13}\text{C}$ ) spectrum of compound **1b** in  $\text{CDCl}_3$ .

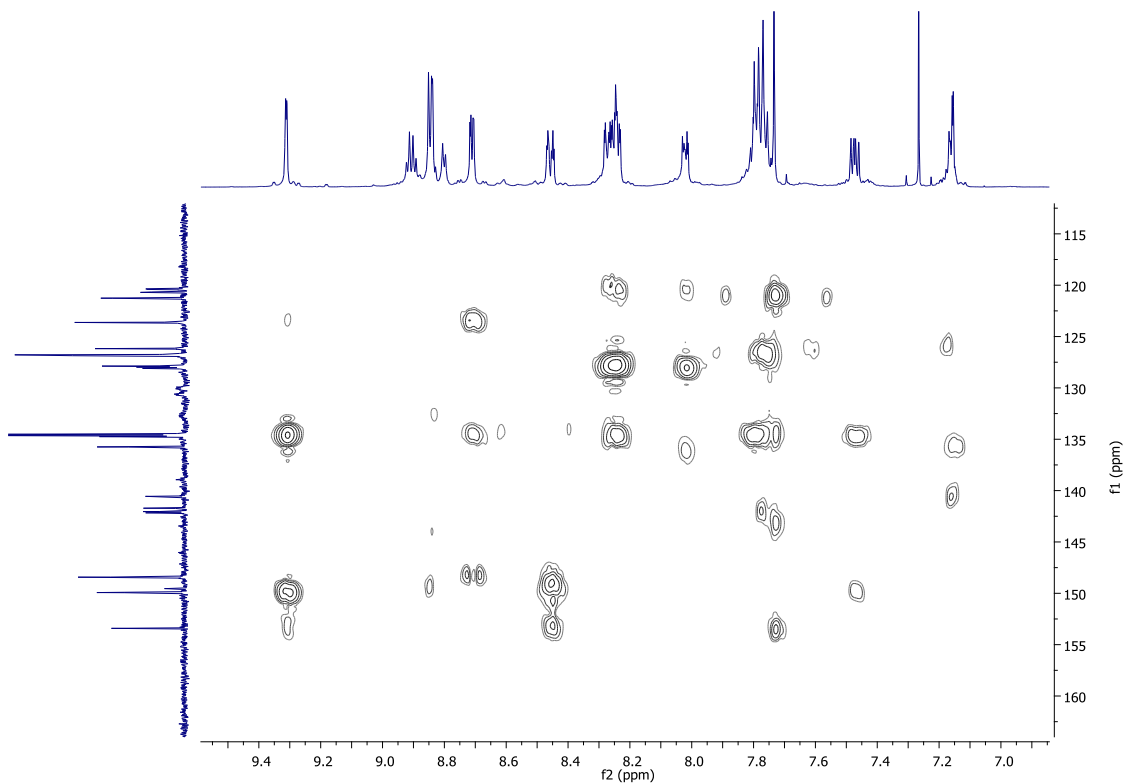

Figure S5. Partial HMBC ( $^1\text{H}/^{13}\text{C}$ ) spectrum of compound **1b** in  $\text{CDCl}_3$ .

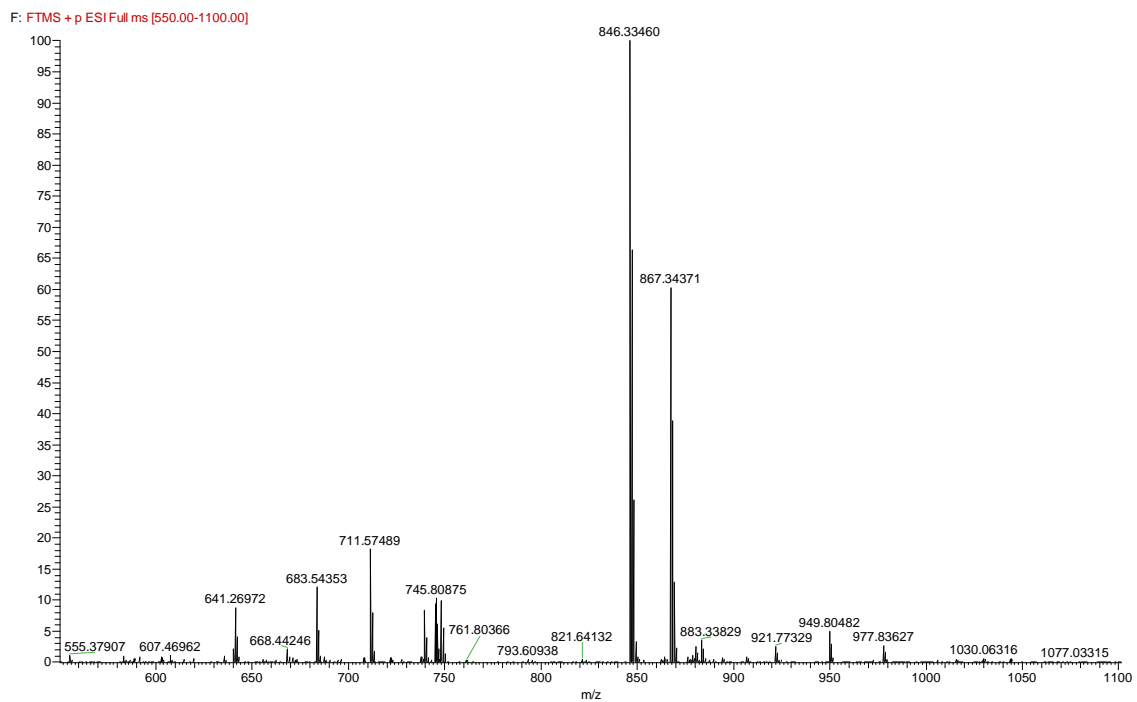

Figure S6. HRMS spectrum of compound **1b**.

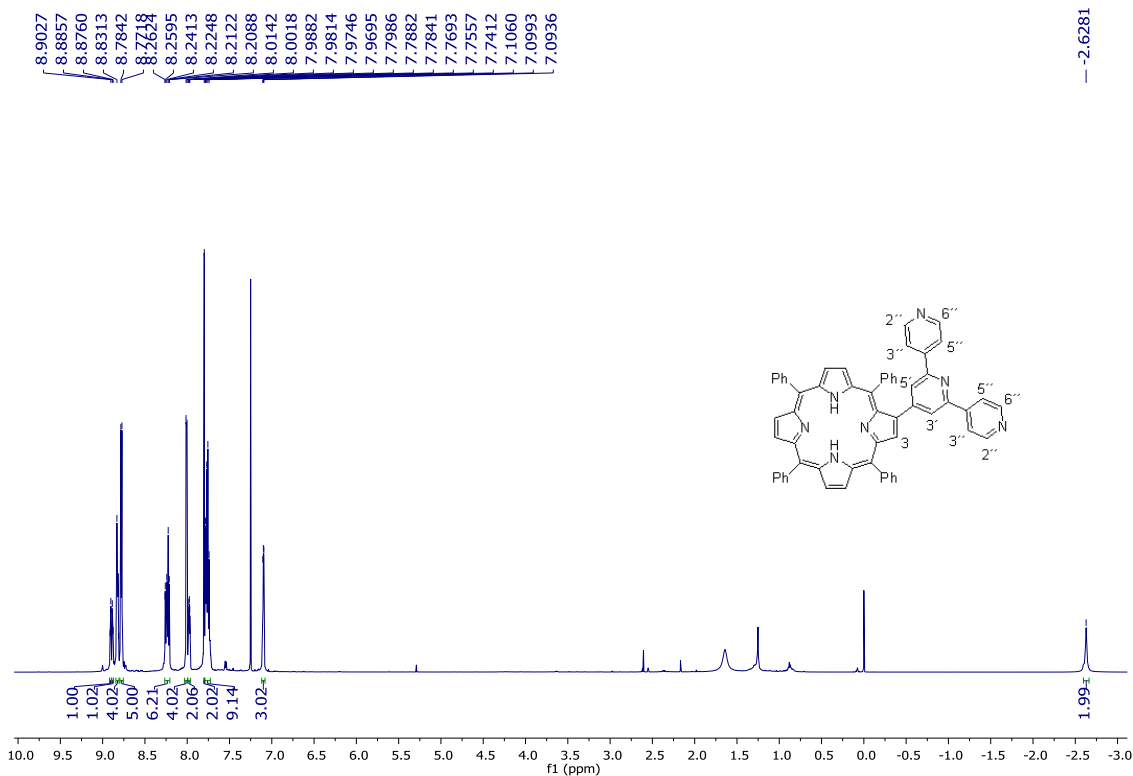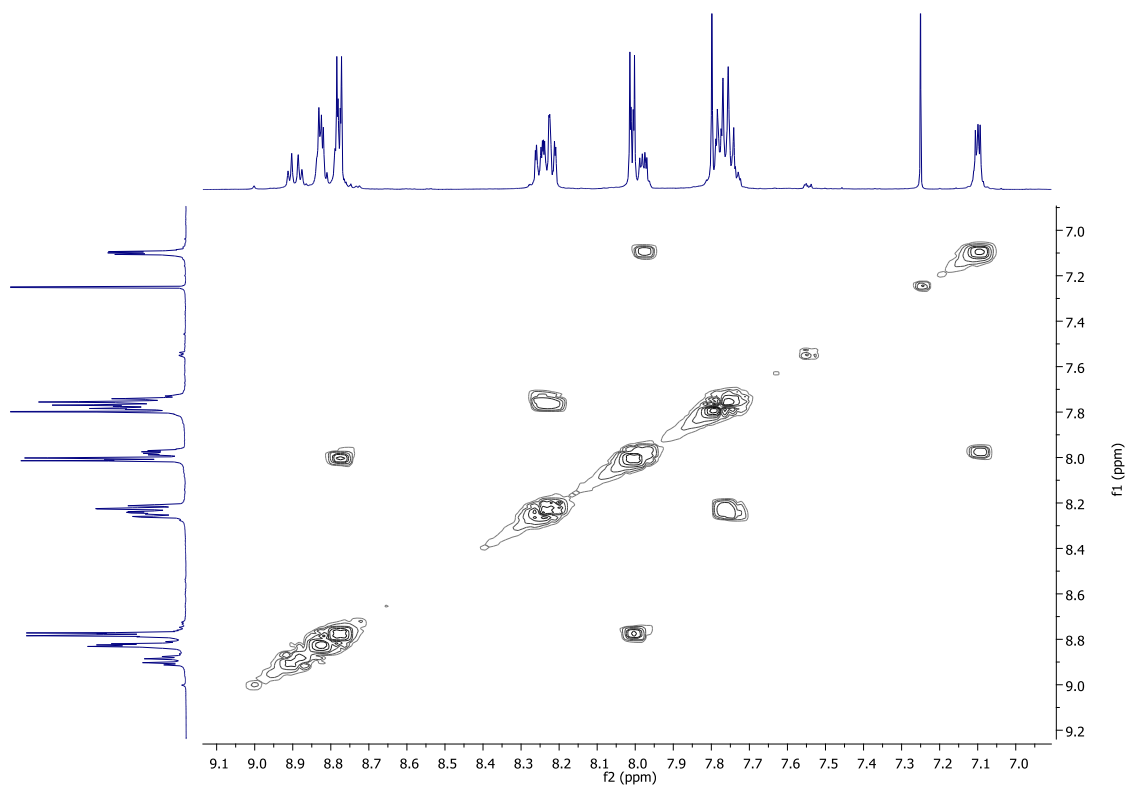

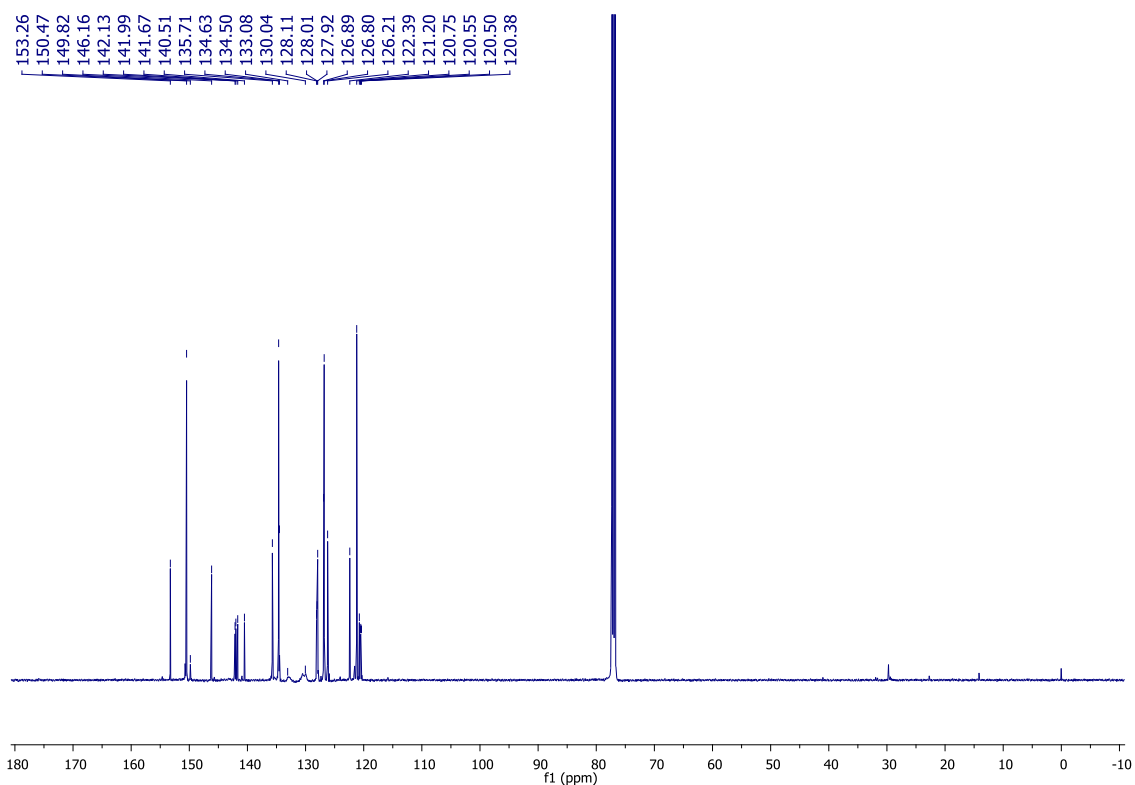

Figure S9.  $^{13}\text{C}$  NMR spectrum of compound **1c** in  $\text{CDCl}_3$ .

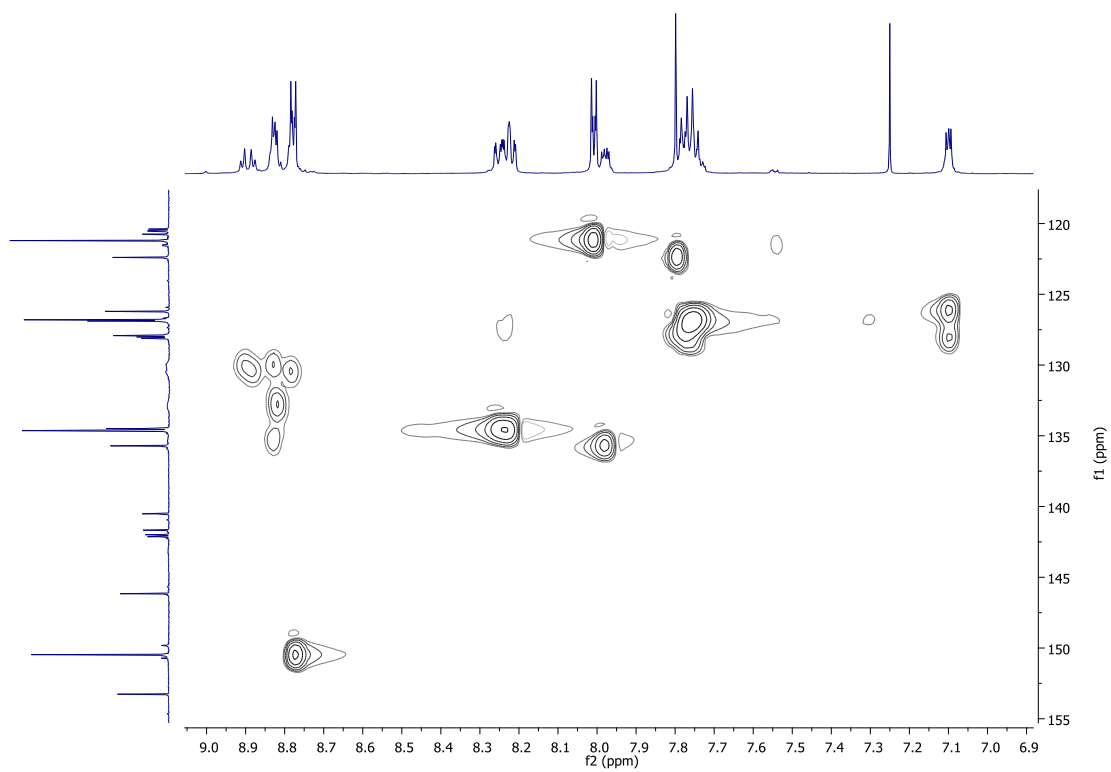

Figure S10. Partial HSQC ( $^1\text{H}/^{13}\text{C}$ ) spectrum of compound **1c** in  $\text{CDCl}_3$ .

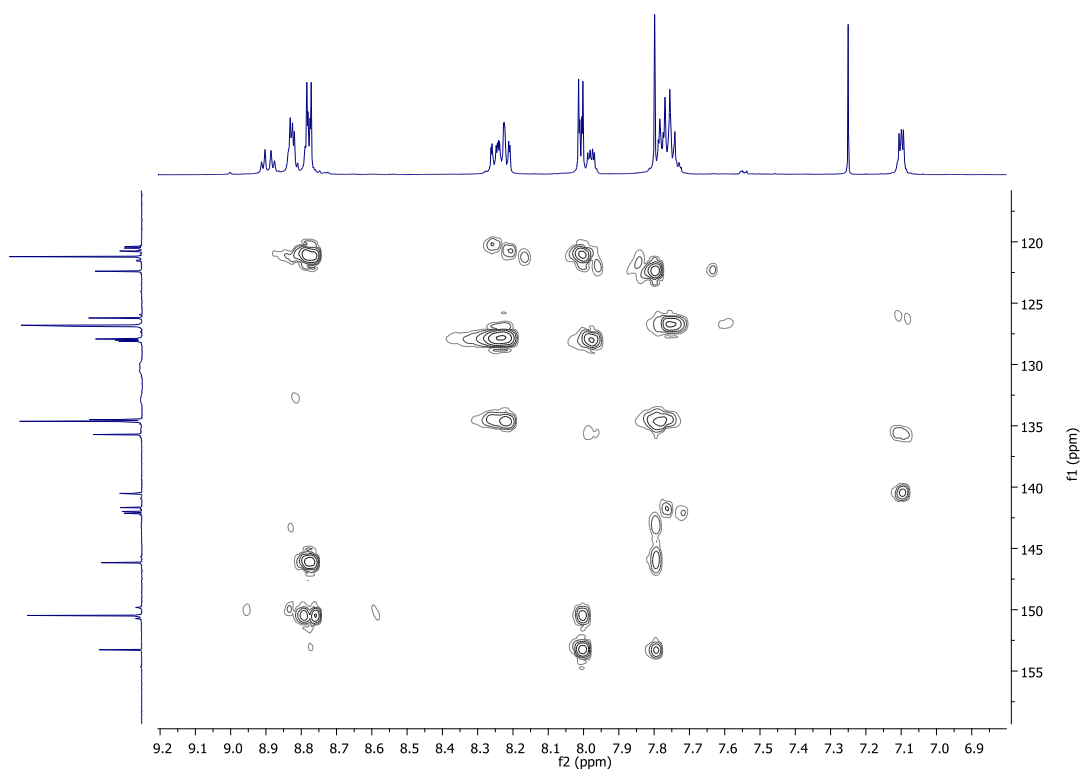

Figure S11. Partial HMBC ( $^1\text{H}/^{13}\text{C}$ ) spectrum of compound **1c** in  $\text{CDCl}_3$ .

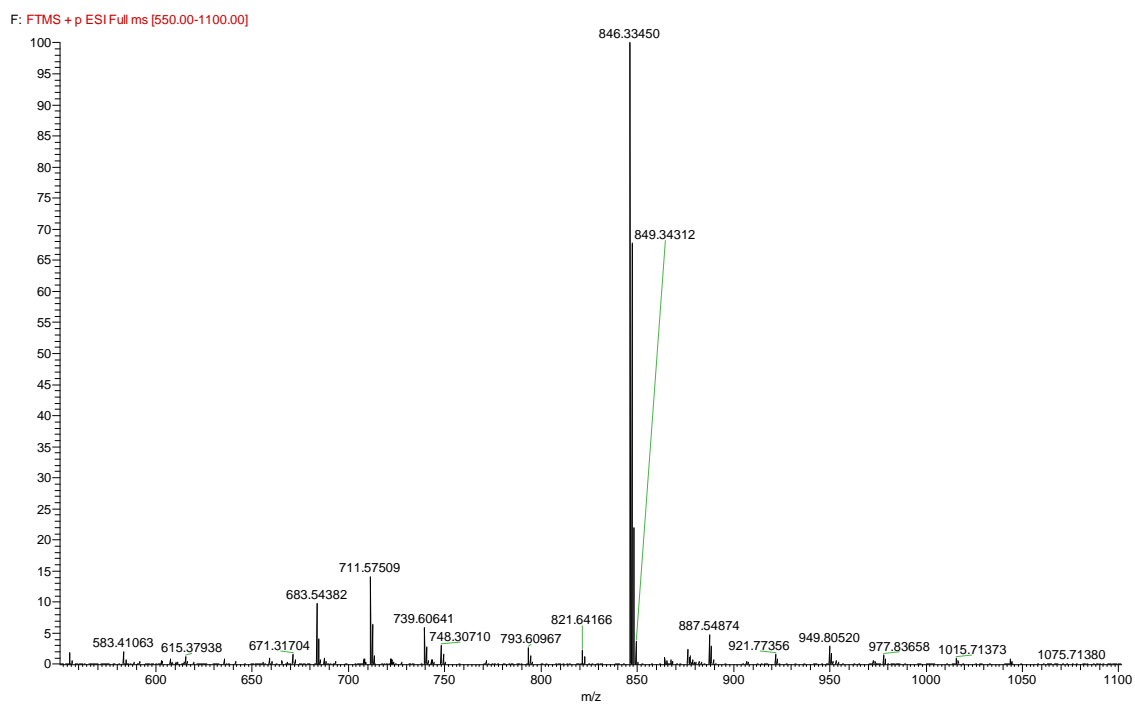

Figure S12. HRMS spectrum of compound **1c**.



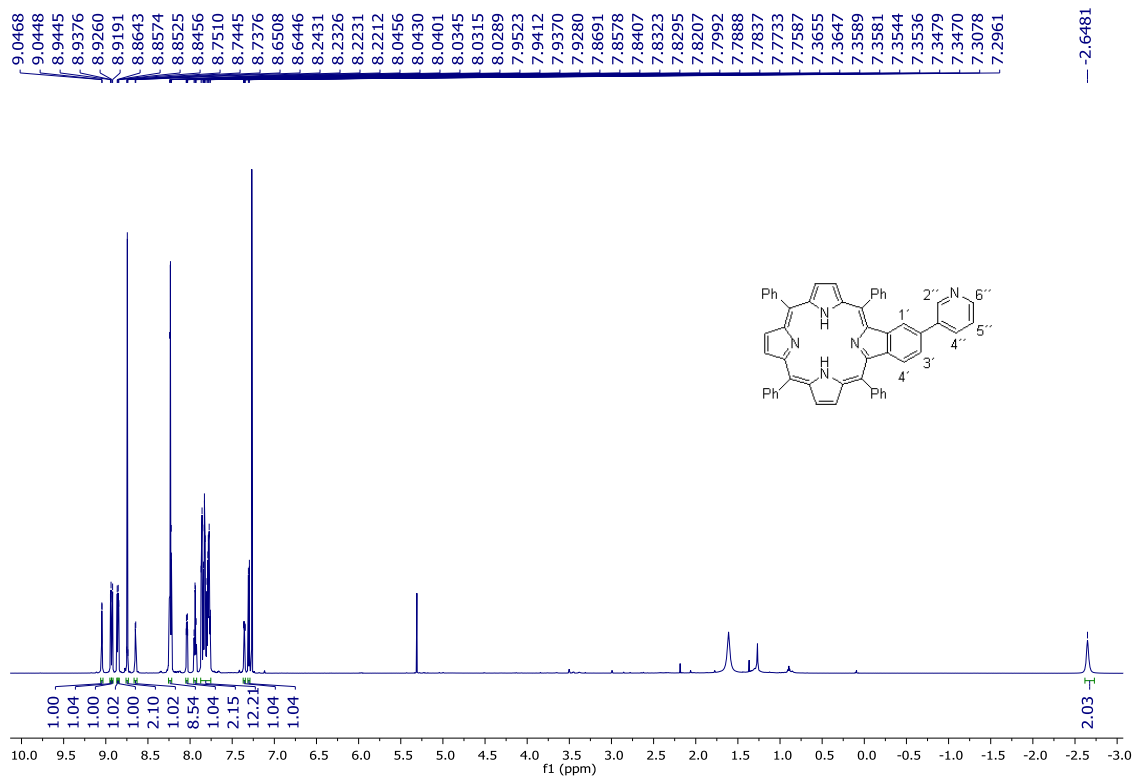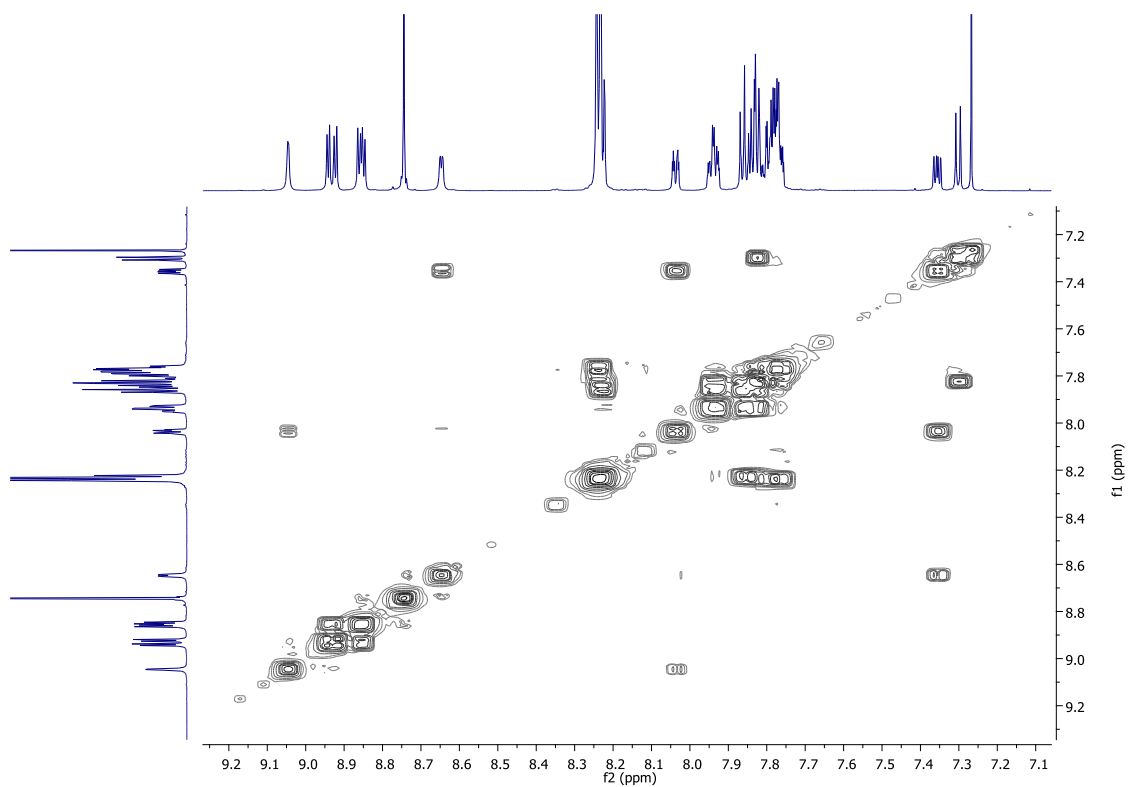

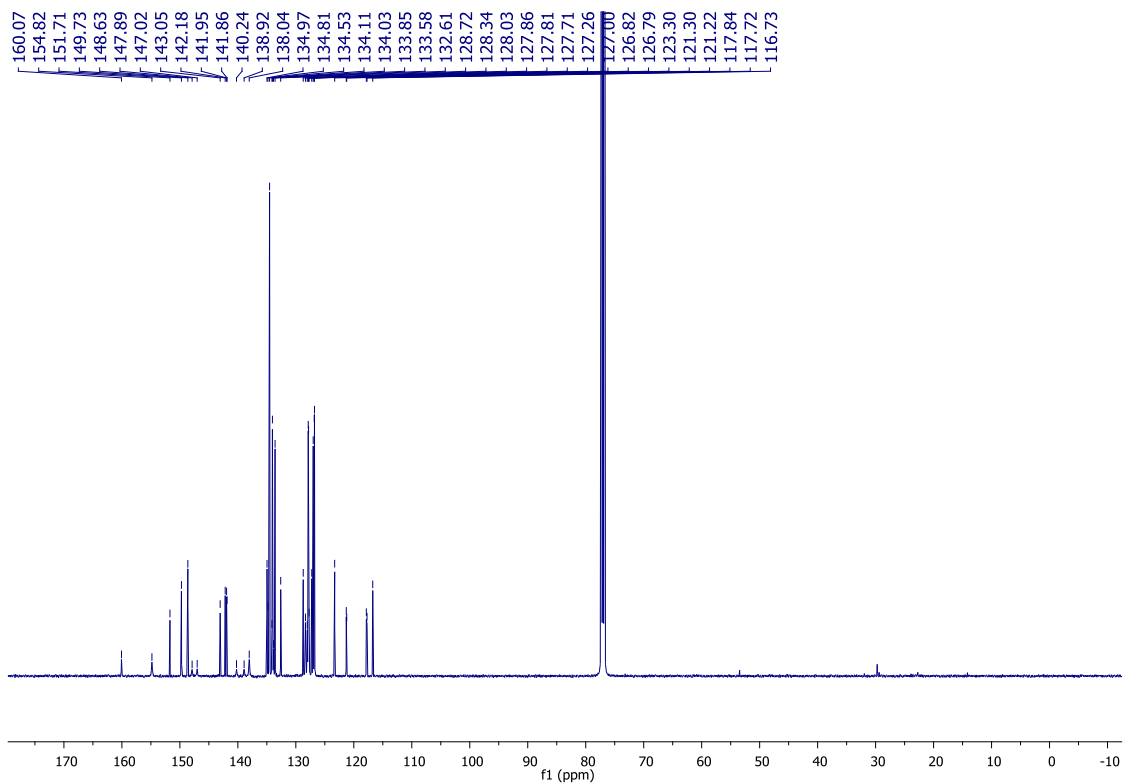

Figure S15.  $^{13}\text{C}$  NMR spectrum of compound **2b** in  $\text{CDCl}_3$ .

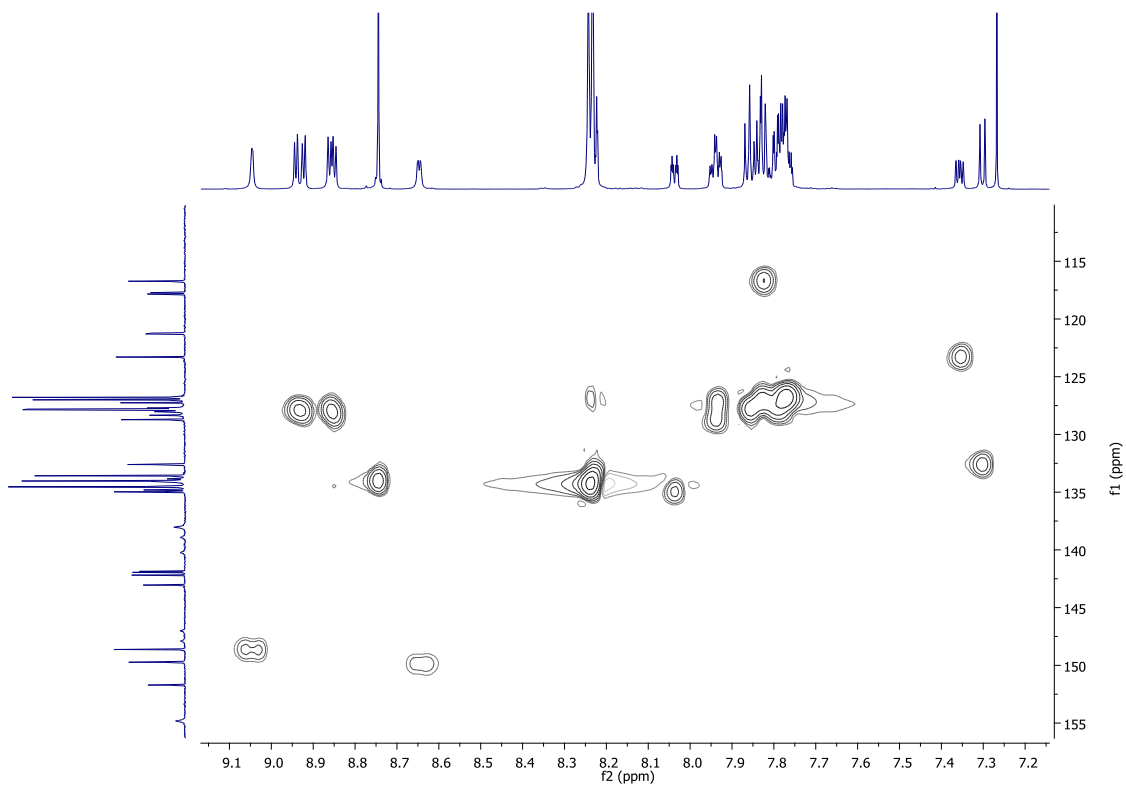

Figure S16. Partial HSQC ( $^1\text{H}/^{13}\text{C}$ ) spectrum of compound **2b** in  $\text{CDCl}_3$ .

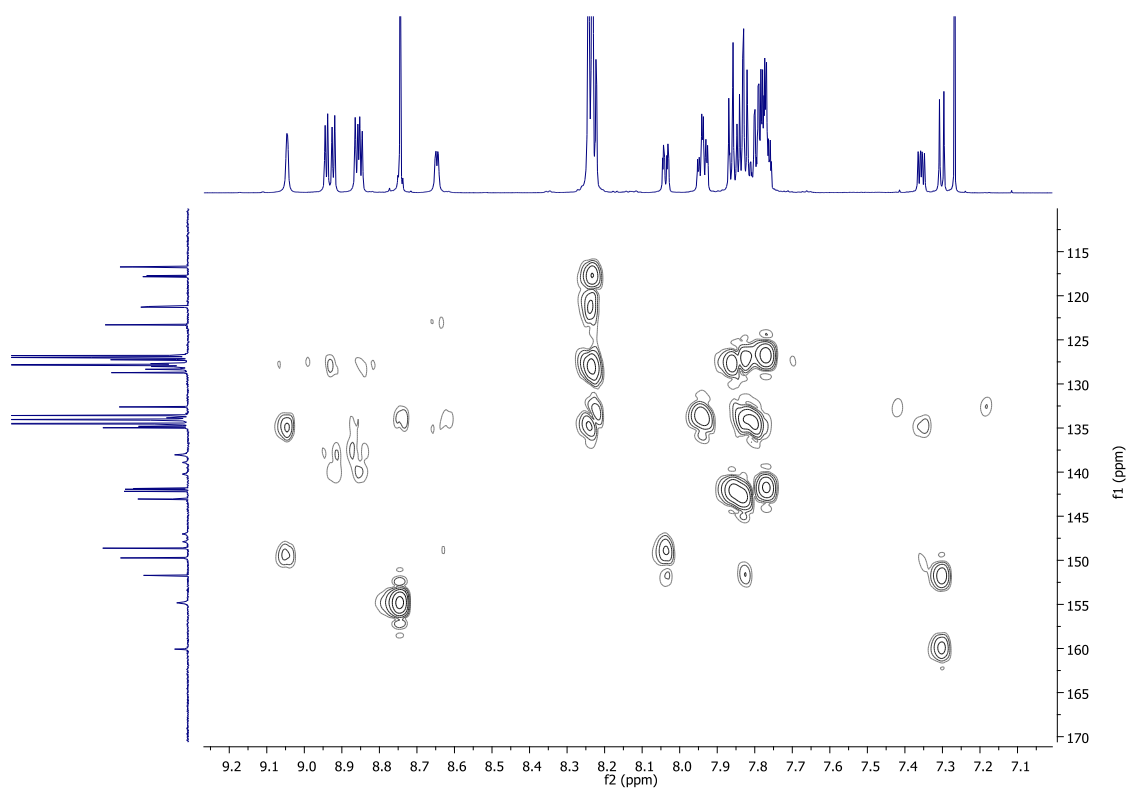

Figure S17. Partial HMBC ( $^1\text{H}/^{13}\text{C}$ ) spectrum of compound **2b** in  $\text{CDCl}_3$ .

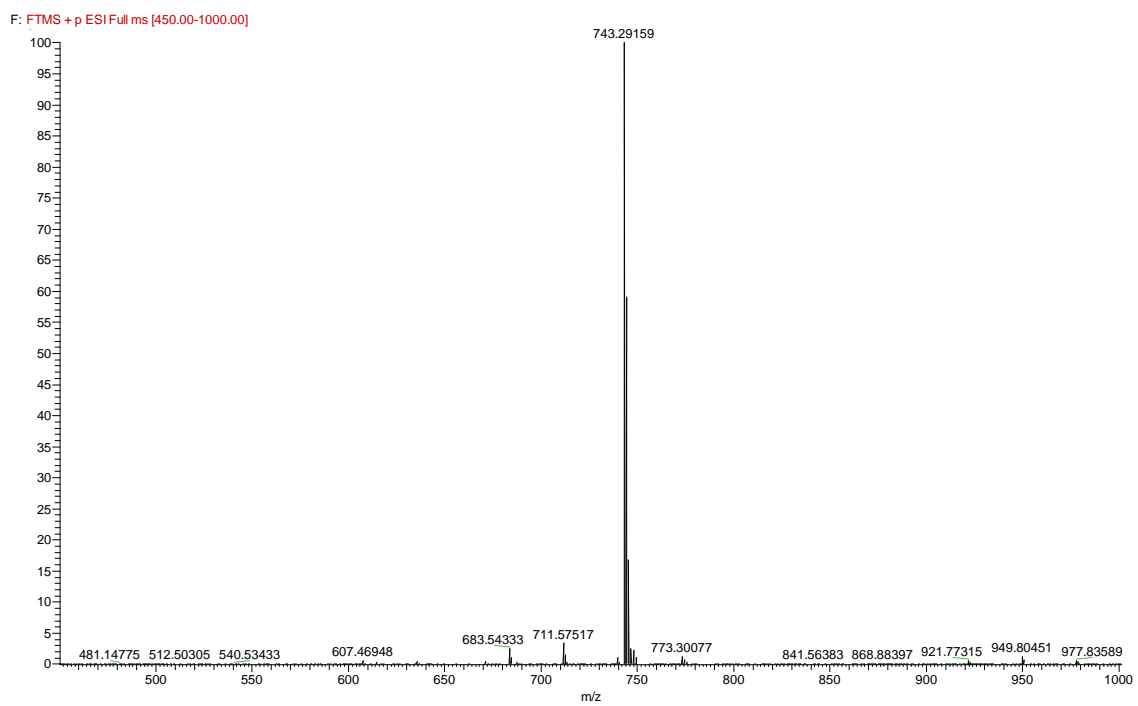

Figure S18. HRMS spectrum of compound **2b**.

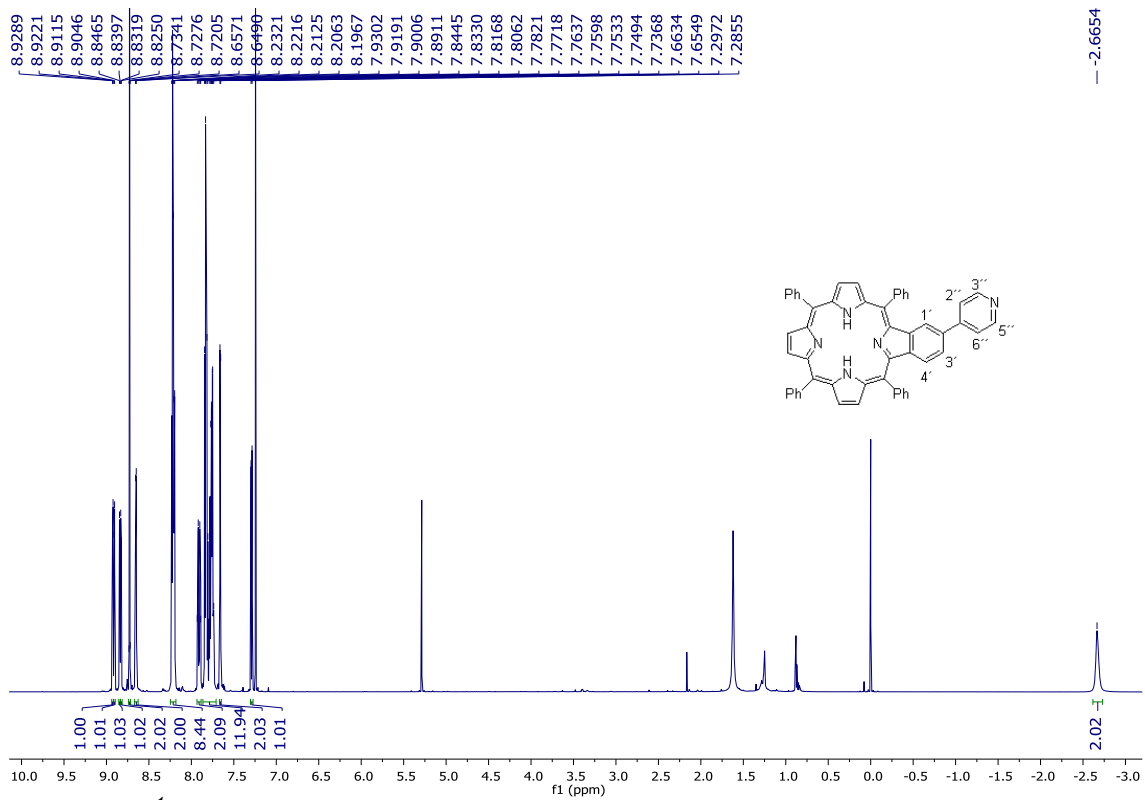

Figure S19.  $^1\text{H}$  NMR spectrum of compound **2c** in  $\text{CDCl}_3$ .

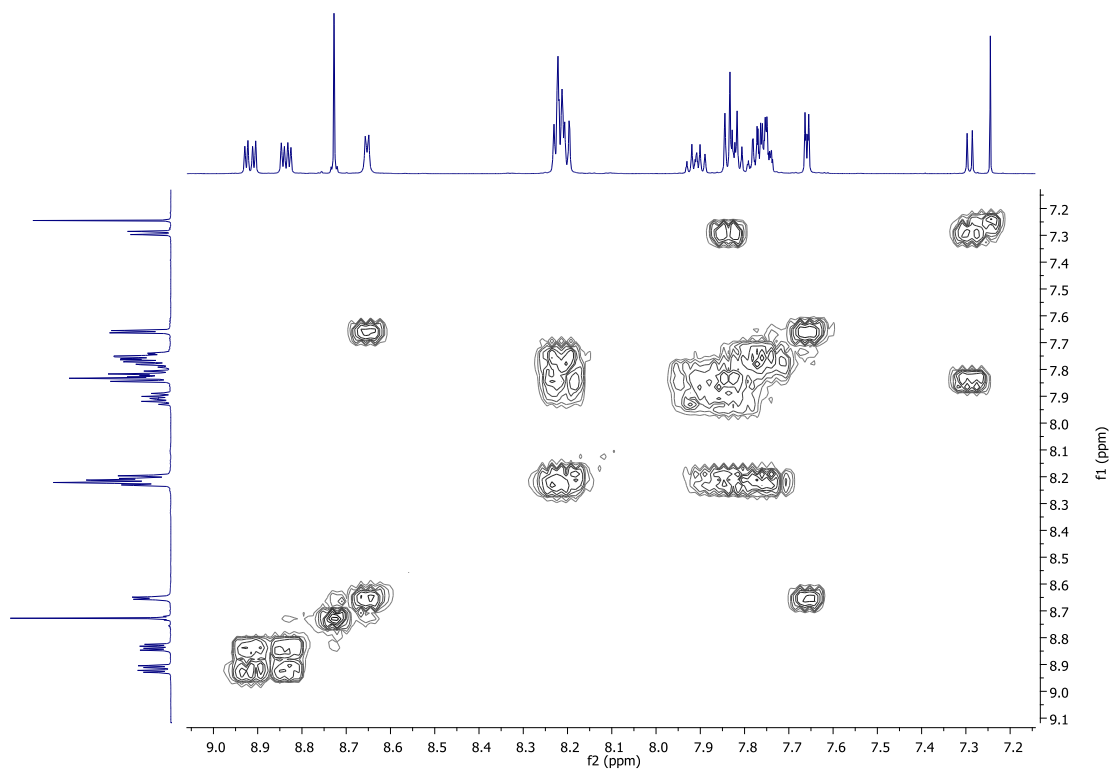

Figure S20. Partial COSY ( $^1\text{H}/^1\text{H}$ ) spectrum of compound **2c** in  $\text{CDCl}_3$ .

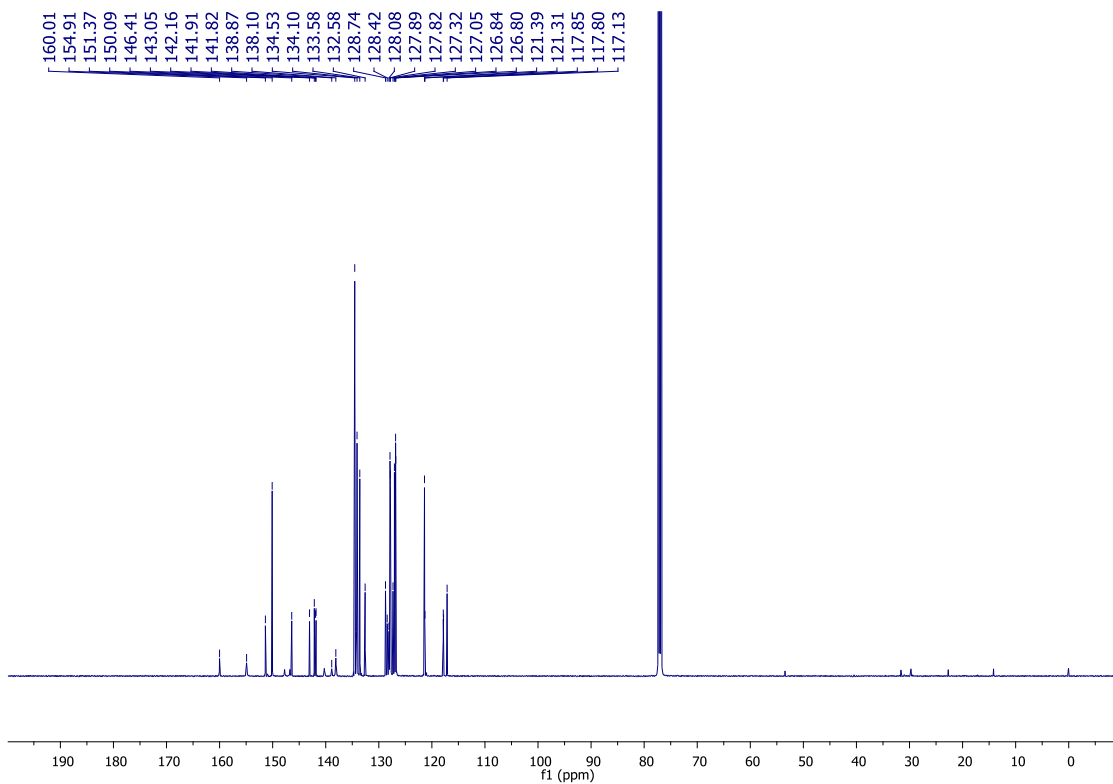

Figure S21.  $^{13}\text{C}$ -NMR spectrum of compound **2c** in  $\text{CDCl}_3$ .

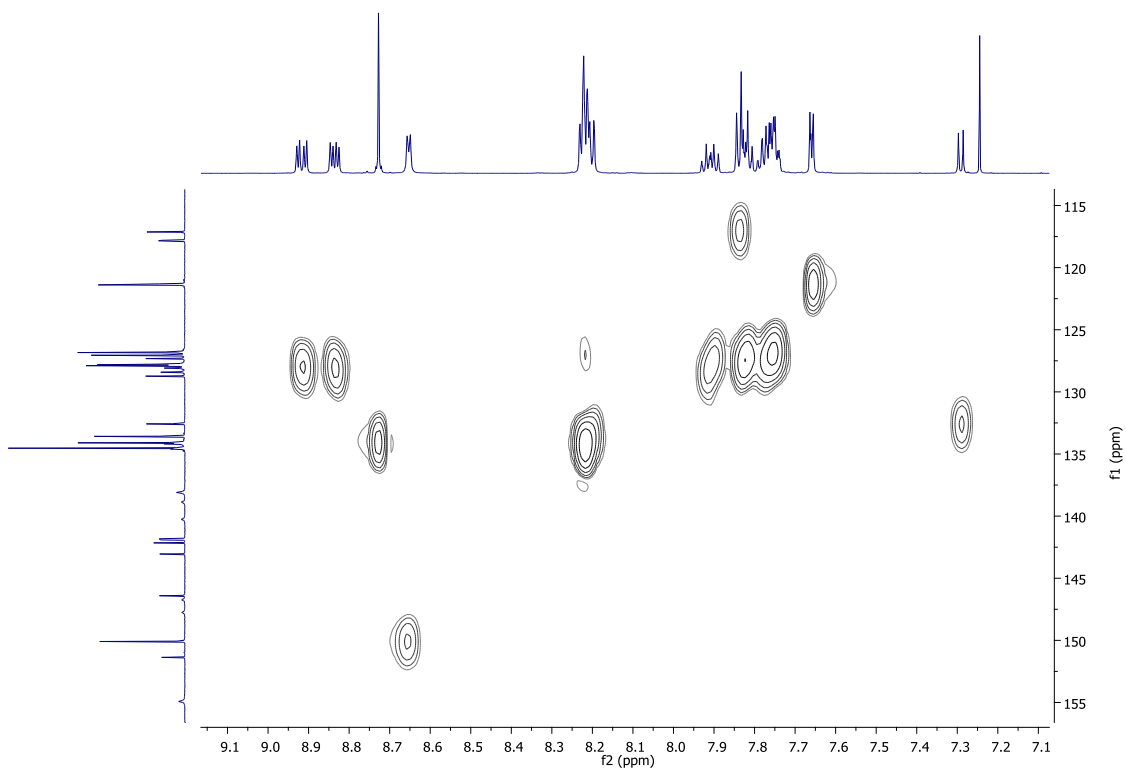

Figure S22. Partial HSQC ( $^1\text{H}/^{13}\text{C}$ ) spectrum of compound **2c** in  $\text{CDCl}_3$ .

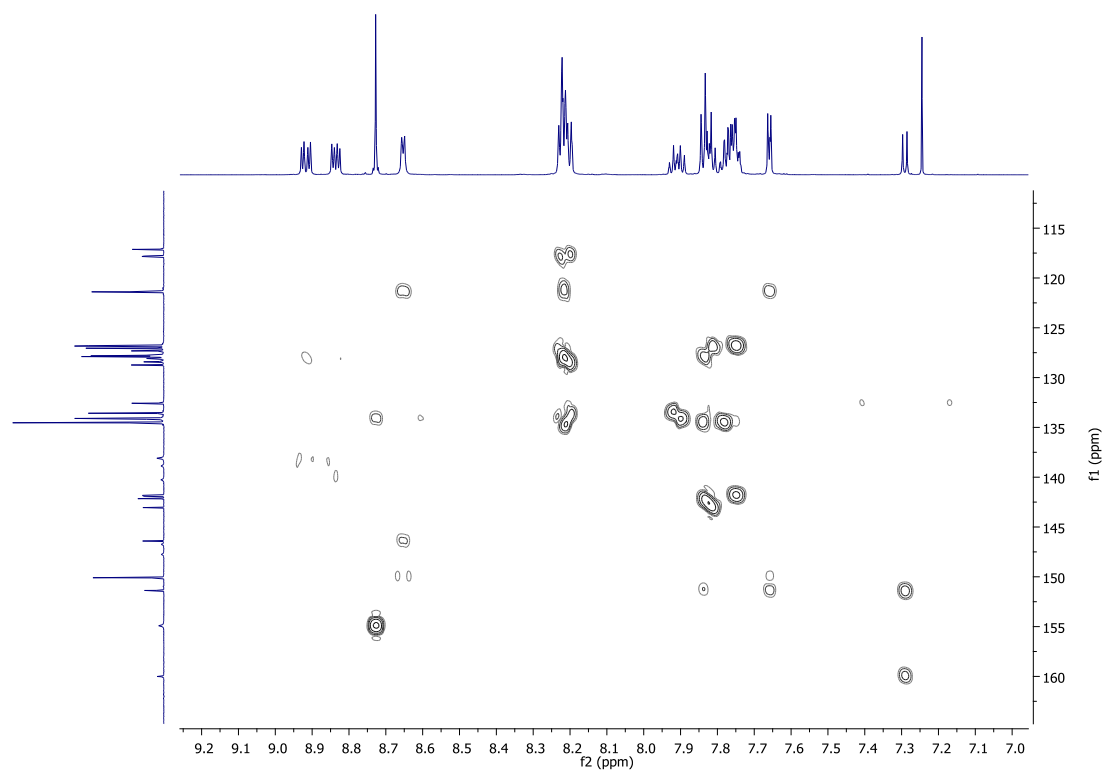

Figure S23. Partial HMBC ( $^1\text{H}/^{13}\text{C}$ ) spectrum of compound **2c** in  $\text{CDCl}_3$ .

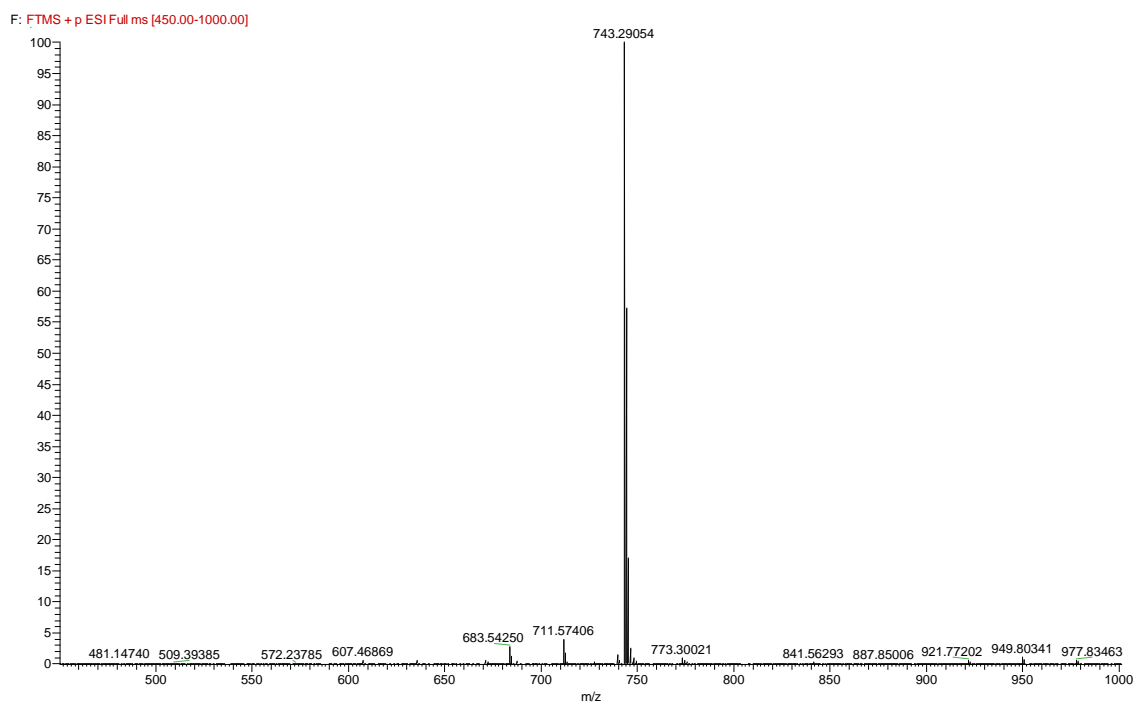

Figure S24. HRMS spectrum of compound **2c**.

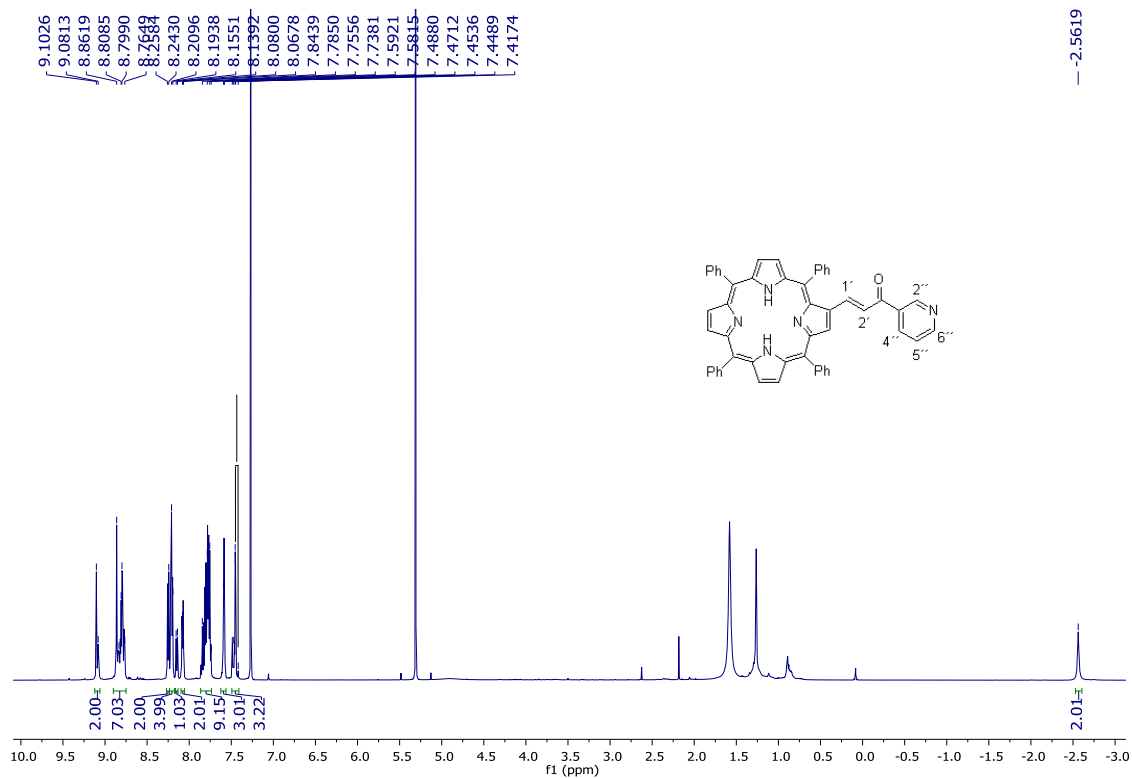

Figure S25.  $^1\text{H}$  NMR spectrum of compound **3b** in  $\text{CDCl}_3$ .

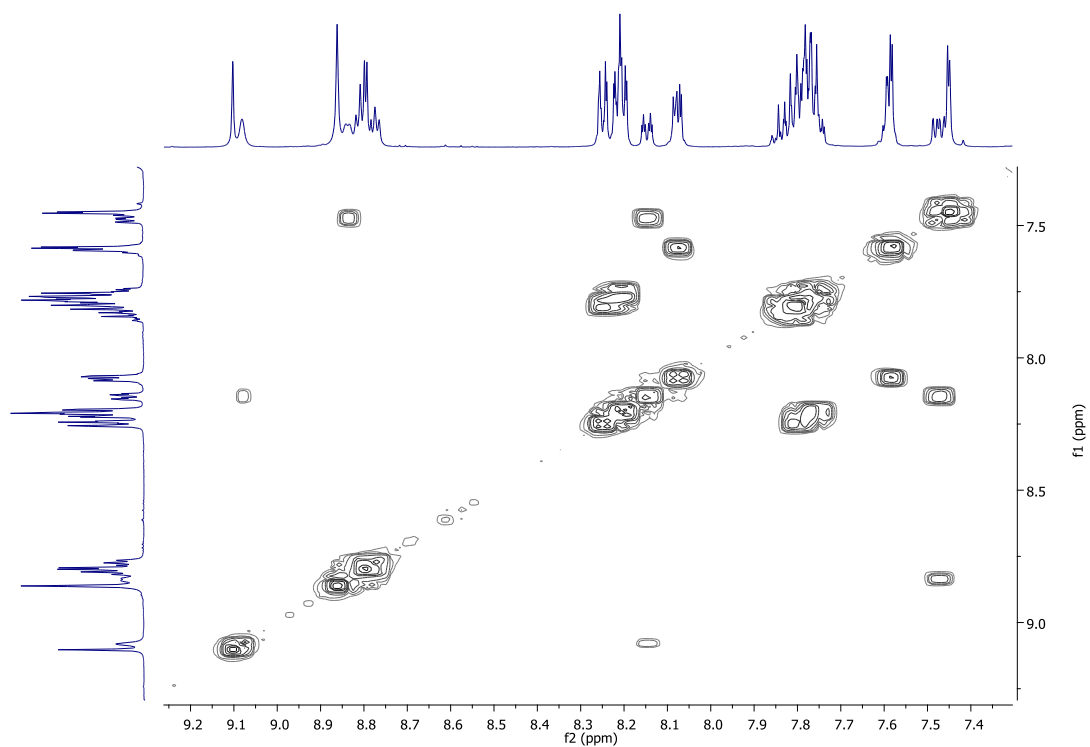

Figure S26. Partial COSY ( $^1\text{H}/^1\text{H}$ ) spectrum of compound **3b** in  $\text{CDCl}_3$ .

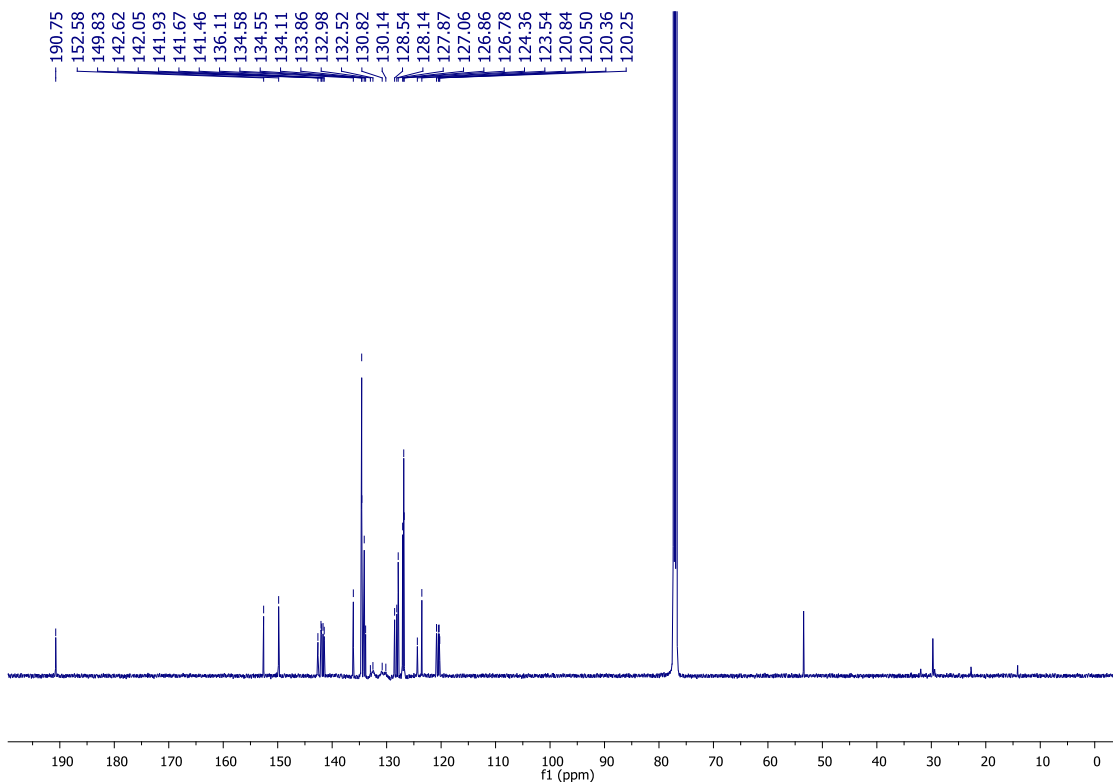

Figure S27.  $^{13}\text{C}$  NMR spectrum of compound **3b** in  $\text{CDCl}_3$ .

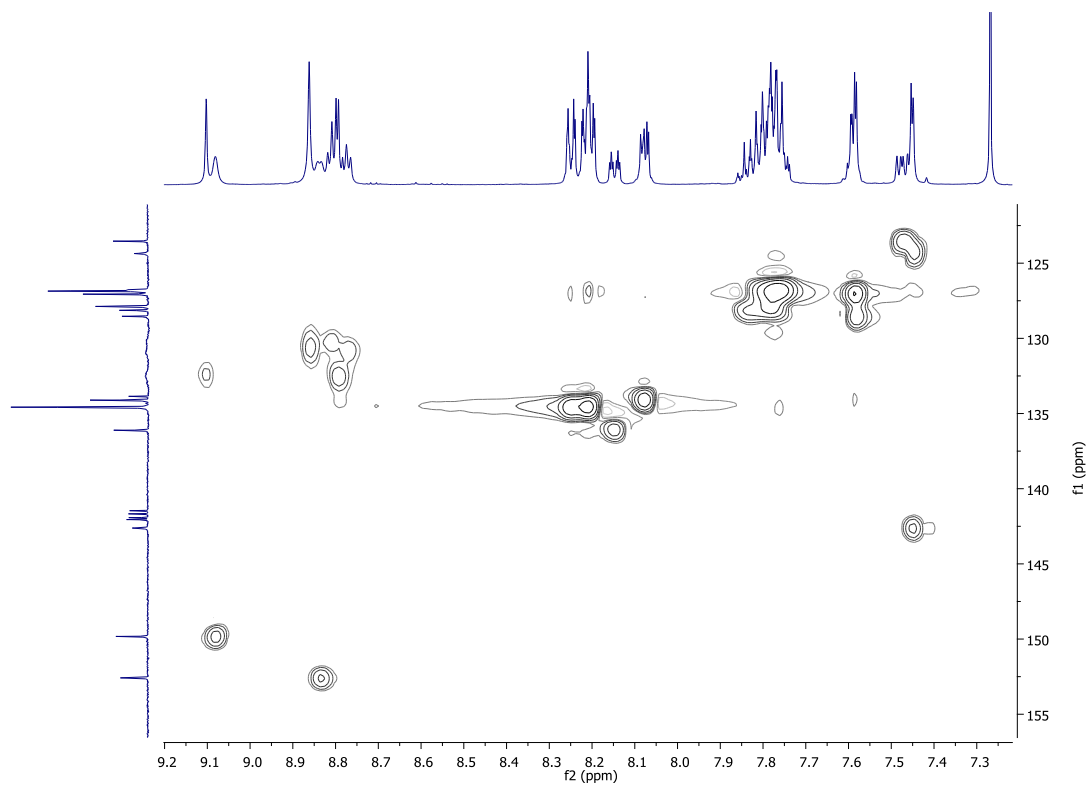

Figure S28. Partial HSQC ( $^1\text{H}/^{13}\text{C}$ ) spectrum of compound **3b** in  $\text{CDCl}_3$ .



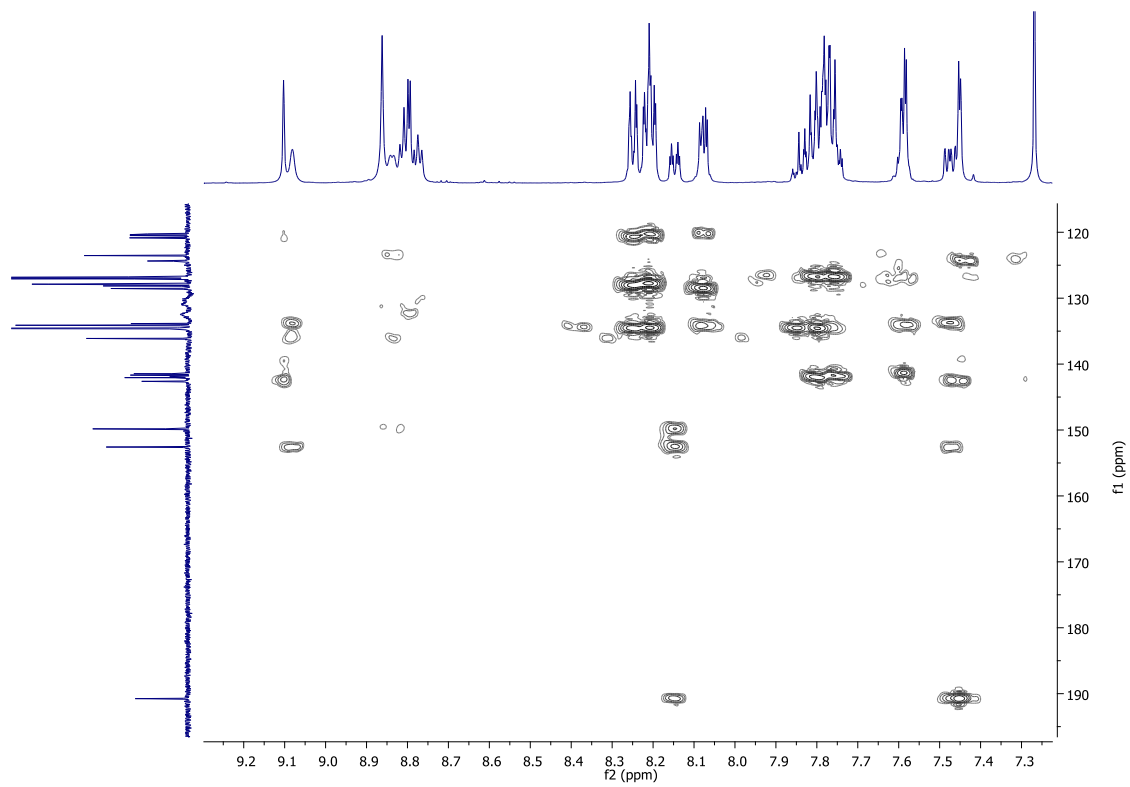

Figure S29. Partial HMBC (<sup>1</sup>H/<sup>13</sup>C) spectrum of compound **3b** in CDCl<sub>3</sub>.

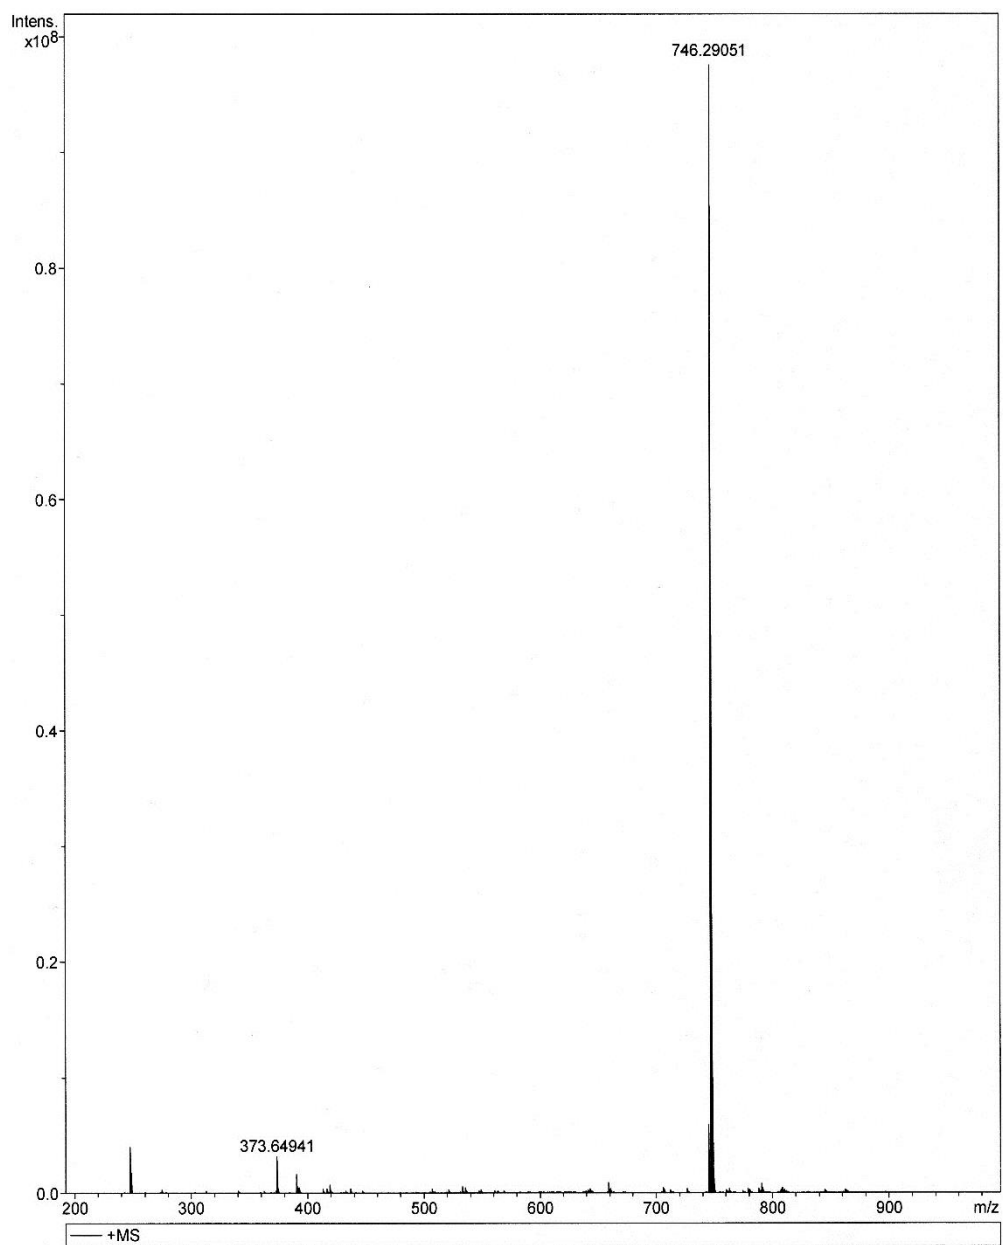

Figure S30. HRMS spectrum of compound **3b**.

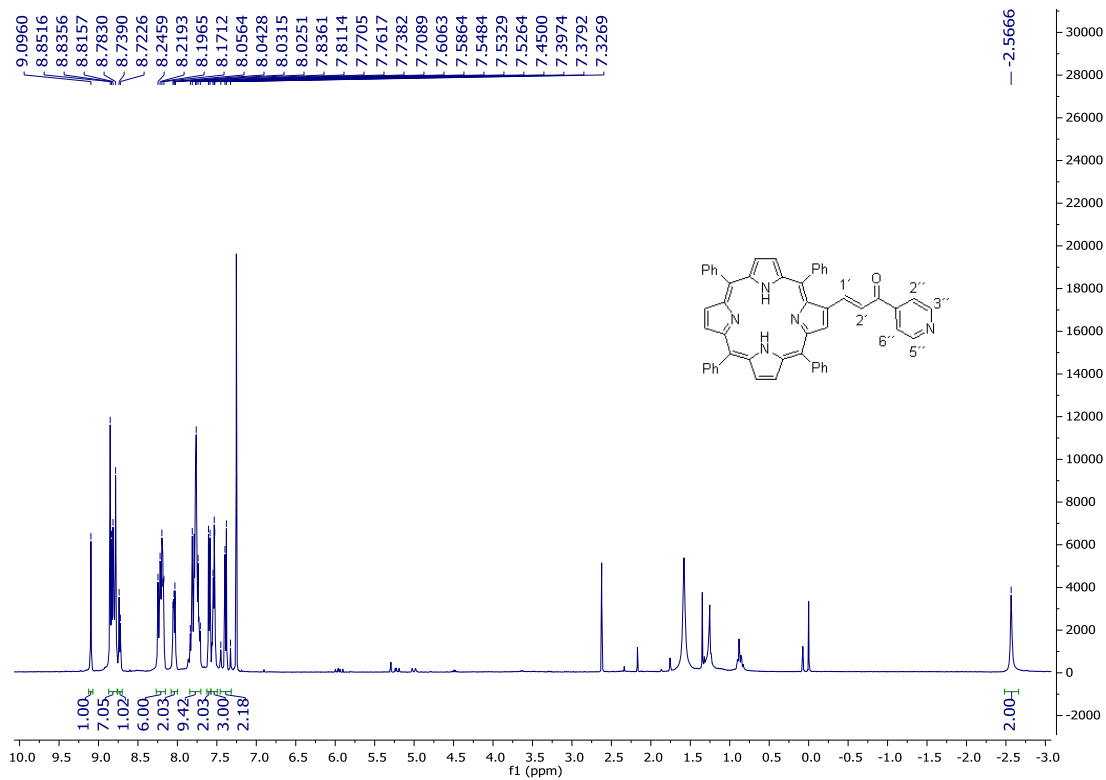

Figure S31.  $^1\text{H}$  NMR spectrum of compound **3c** in  $\text{CDCl}_3$ .

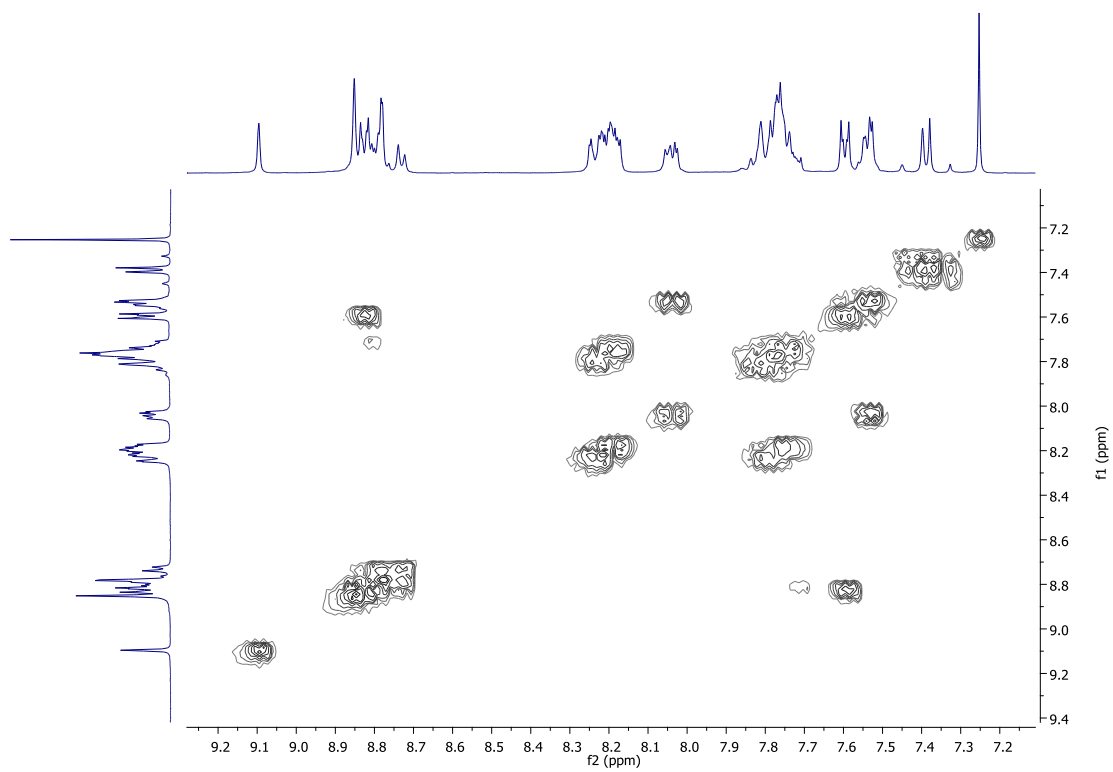

Figure S32. Partial COSY ( $^1\text{H}/^1\text{H}$ ) spectrum of compound **3c** in  $\text{CDCl}_3$ .

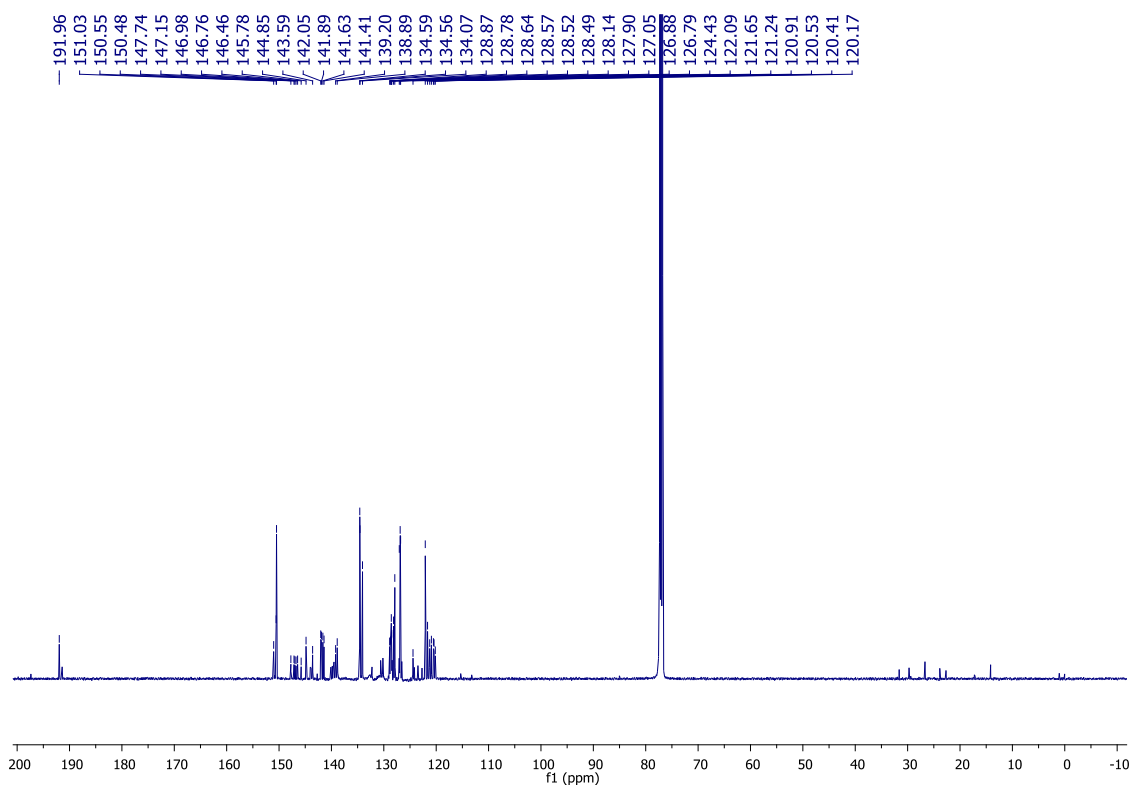

Figure S33.  $^{13}\text{C}$  NMR spectrum of compound **3c** in  $\text{CDCl}_3$ .

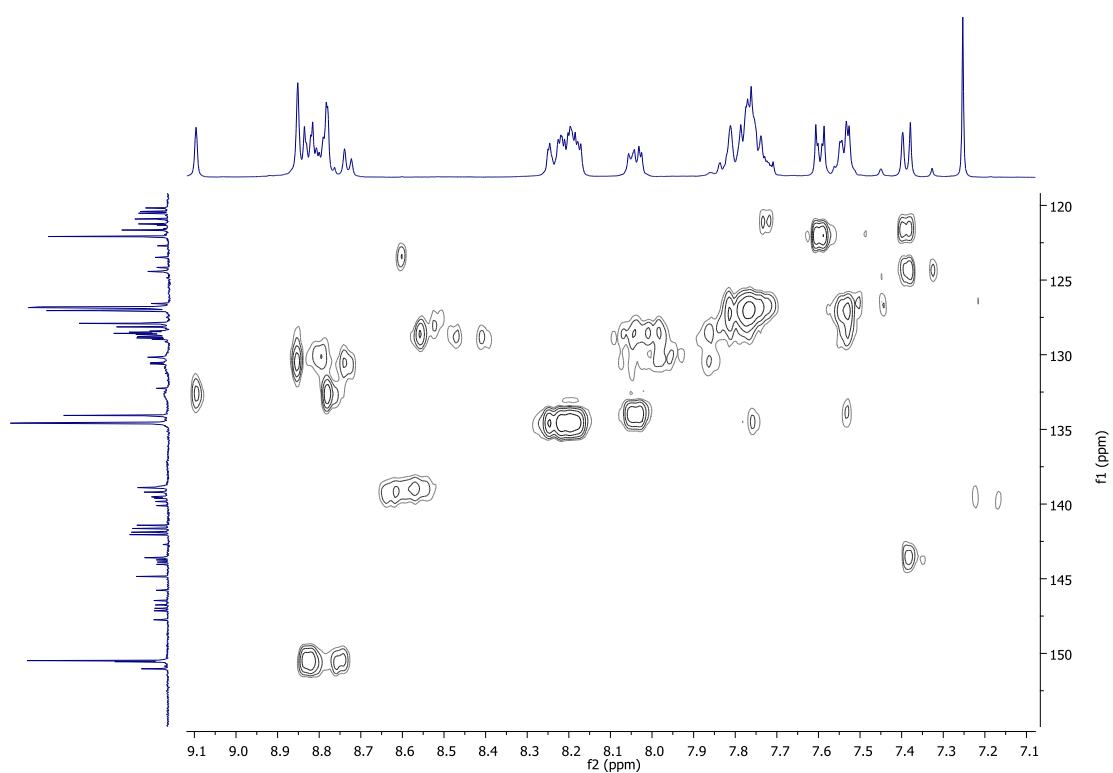

Figure S34. Partial HSQC ( $^1\text{H}/^{13}\text{C}$ ) spectrum of compound **3c** in  $\text{CDCl}_3$ .

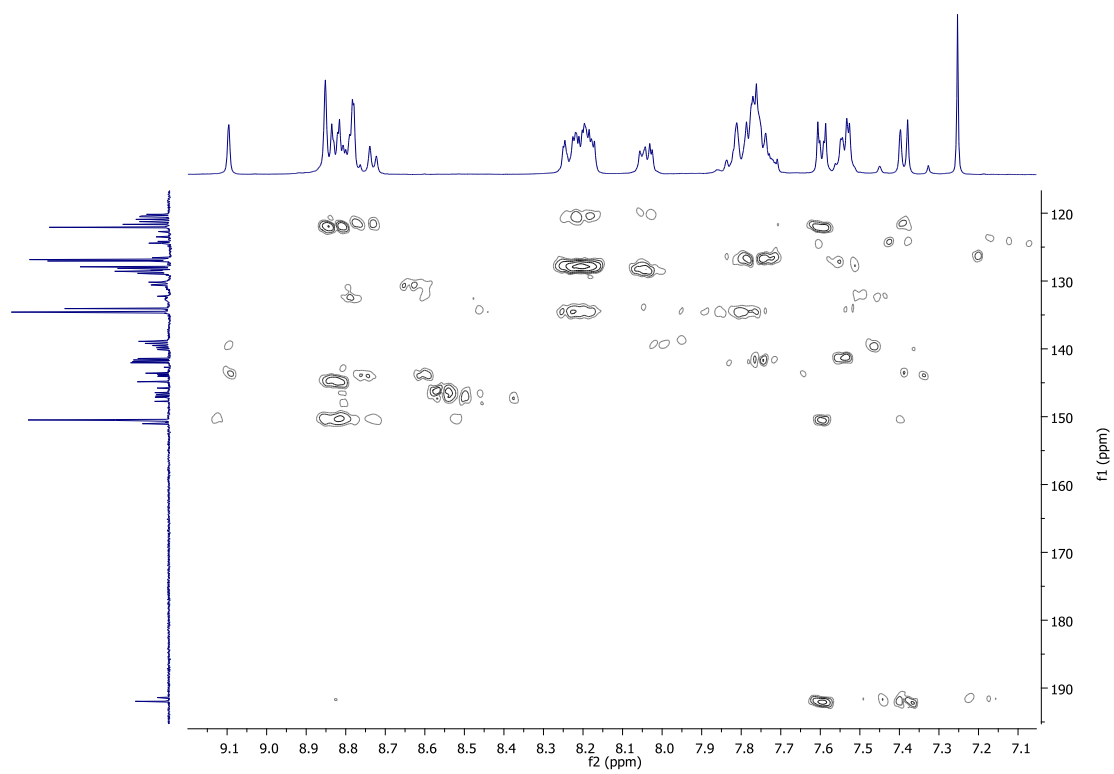

Figure S35. Partial HMBC (<sup>1</sup>H/<sup>13</sup>C) spectrum of compound **3c** in CDCl<sub>3</sub>.

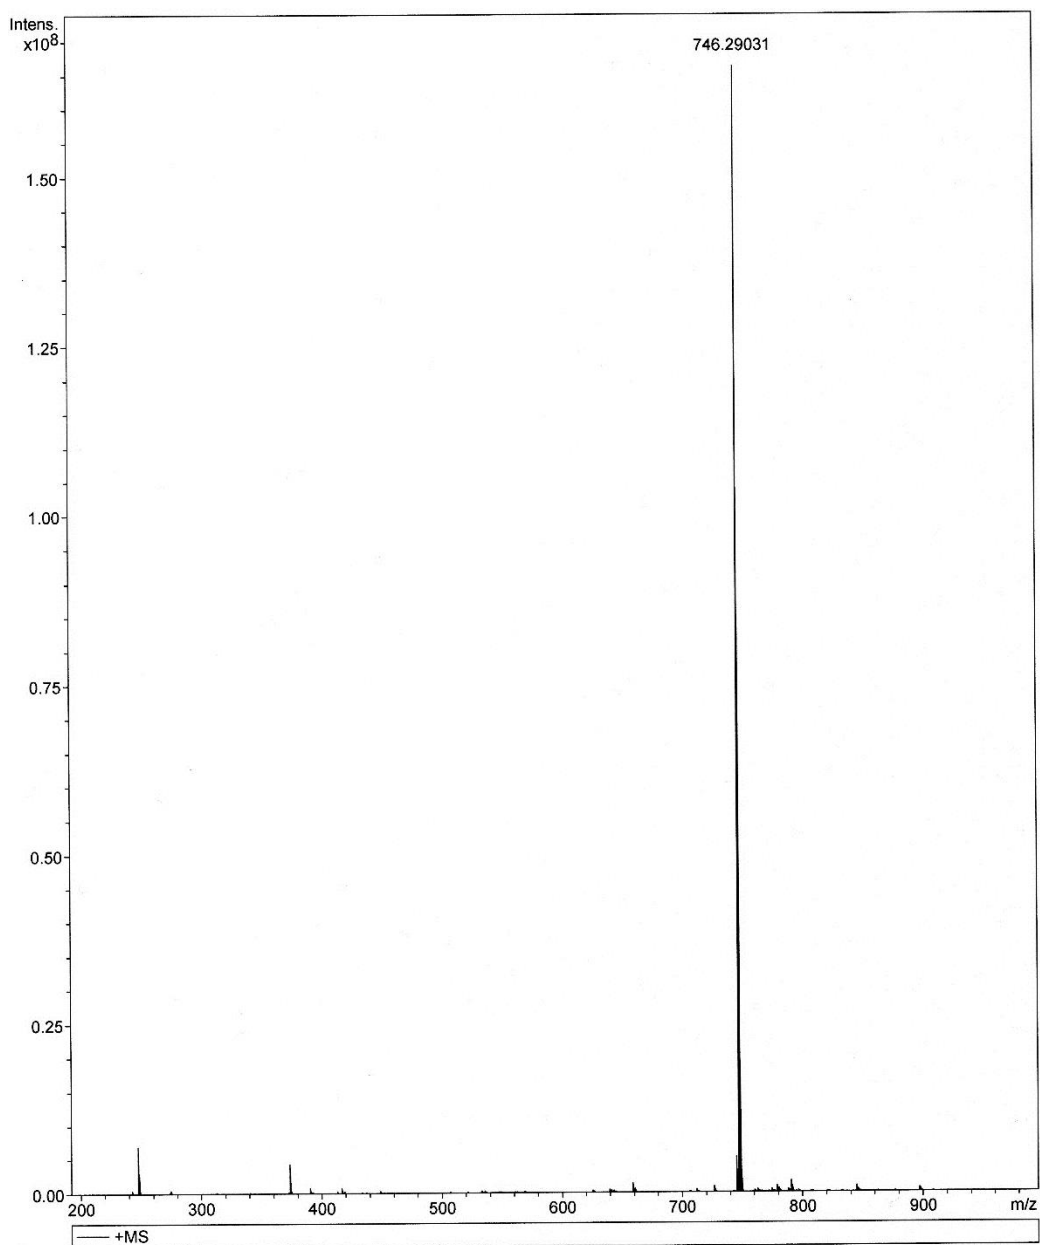

Figure S36. HRMS spectrum of compound **3c**.

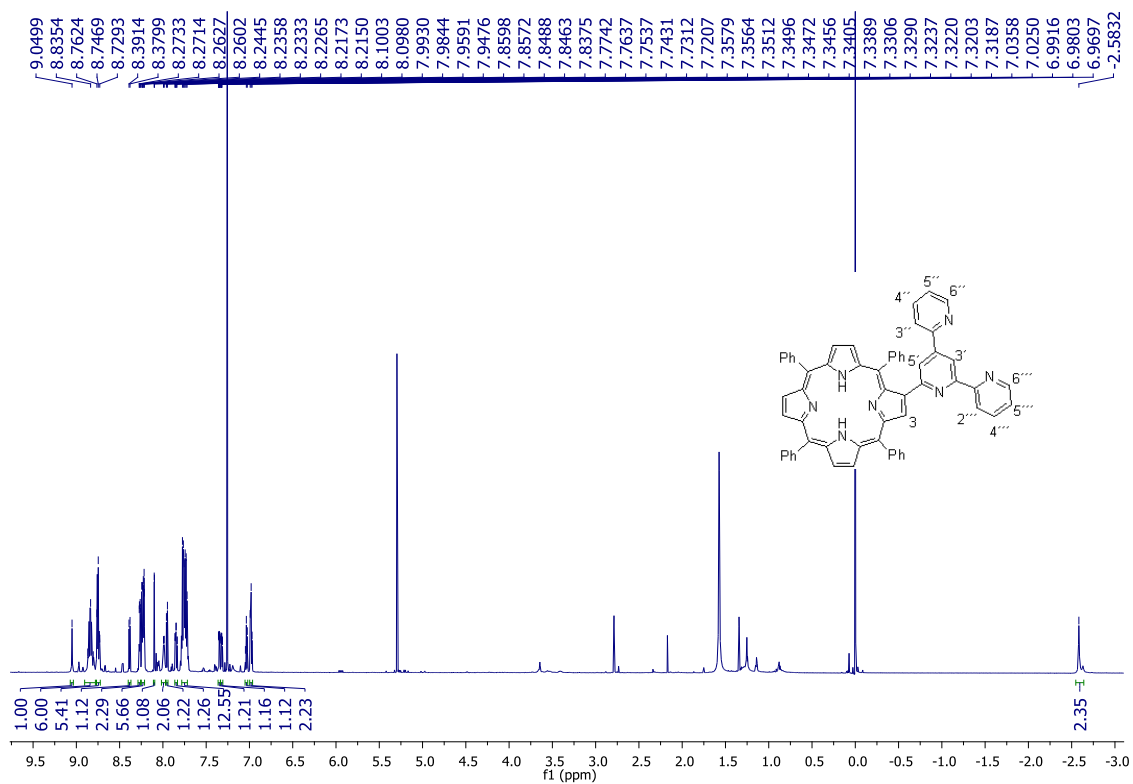

Figure S37.  $^1\text{H}$  NMR spectrum of compound **4** in  $\text{CDCl}_3$ .

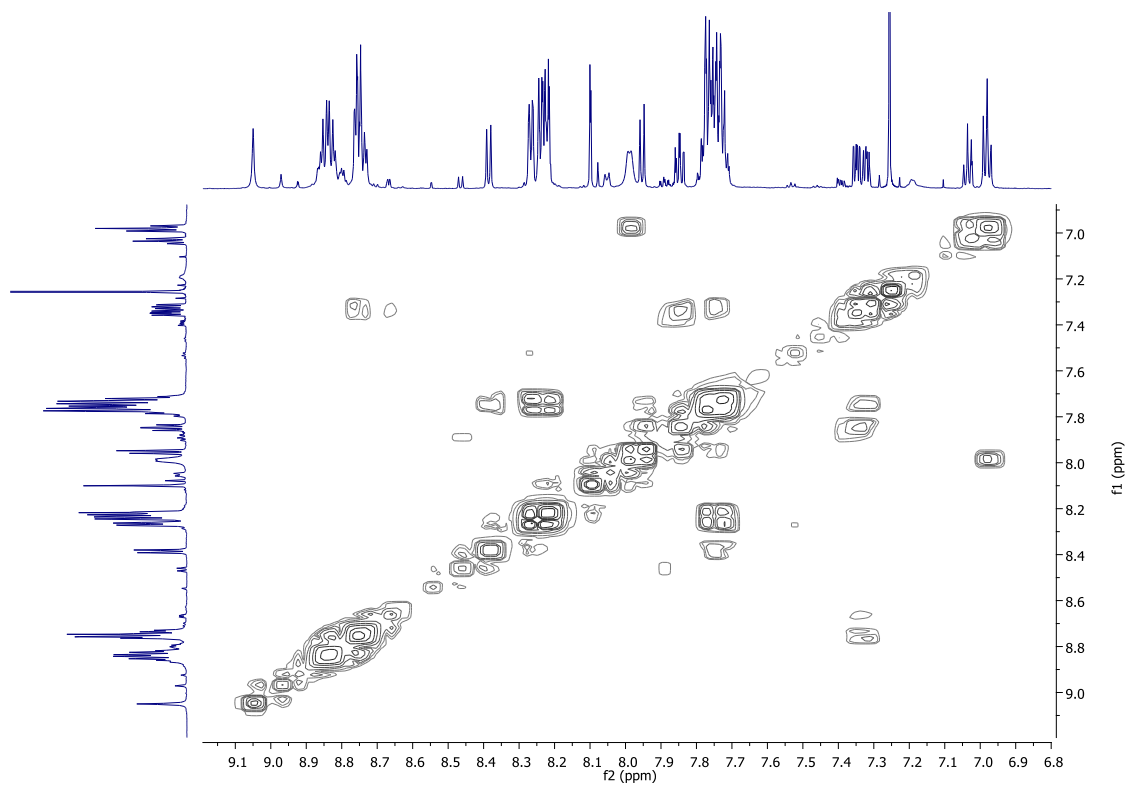

Figure S38. Partial COSY ( $^1\text{H}/^1\text{H}$ ) spectrum of compound **4** in  $\text{CDCl}_3$ .

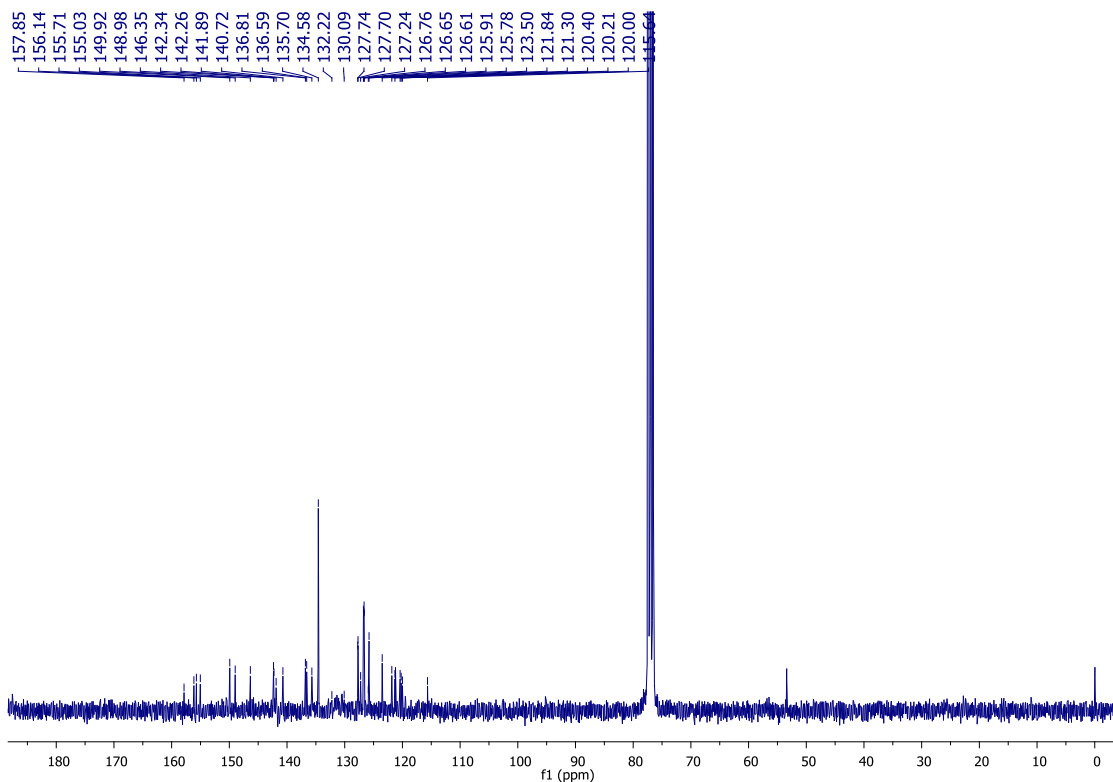

Figure S39.  $^{13}\text{C}$  NMR spectrum of compound **4** in  $\text{CDCl}_3$ .

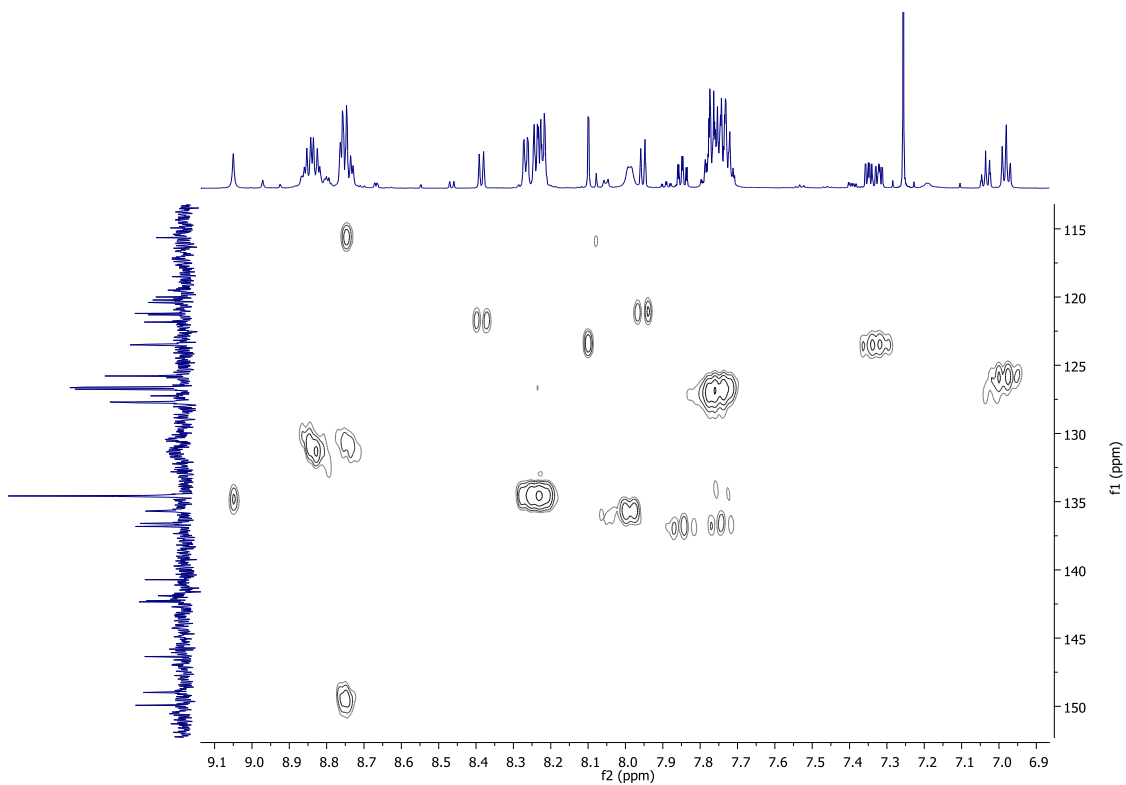

Figure S40. Partial HSQC ( $^1\text{H}/^{13}\text{C}$ ) spectrum of compound **4** in  $\text{CDCl}_3$ .



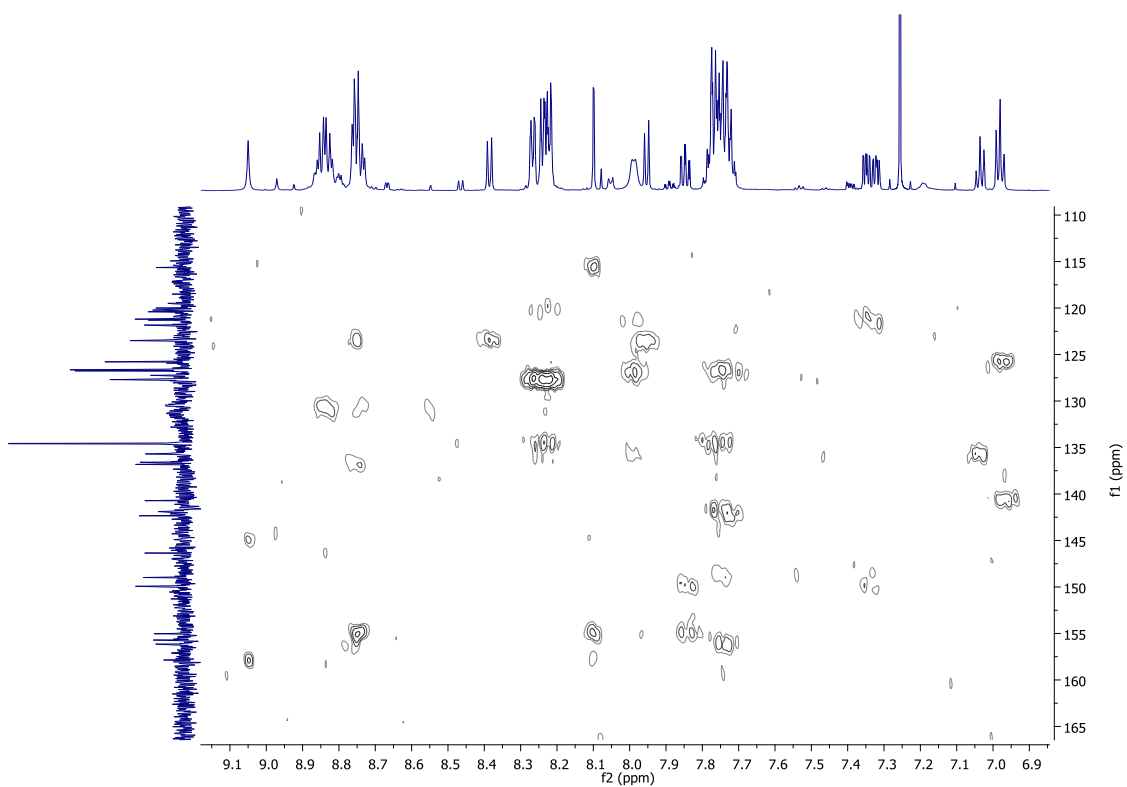

Figure S41. Partial HMBC ( $^1\text{H}/^{13}\text{C}$ ) spectrum of compound **4** in  $\text{CDCl}_3$ .

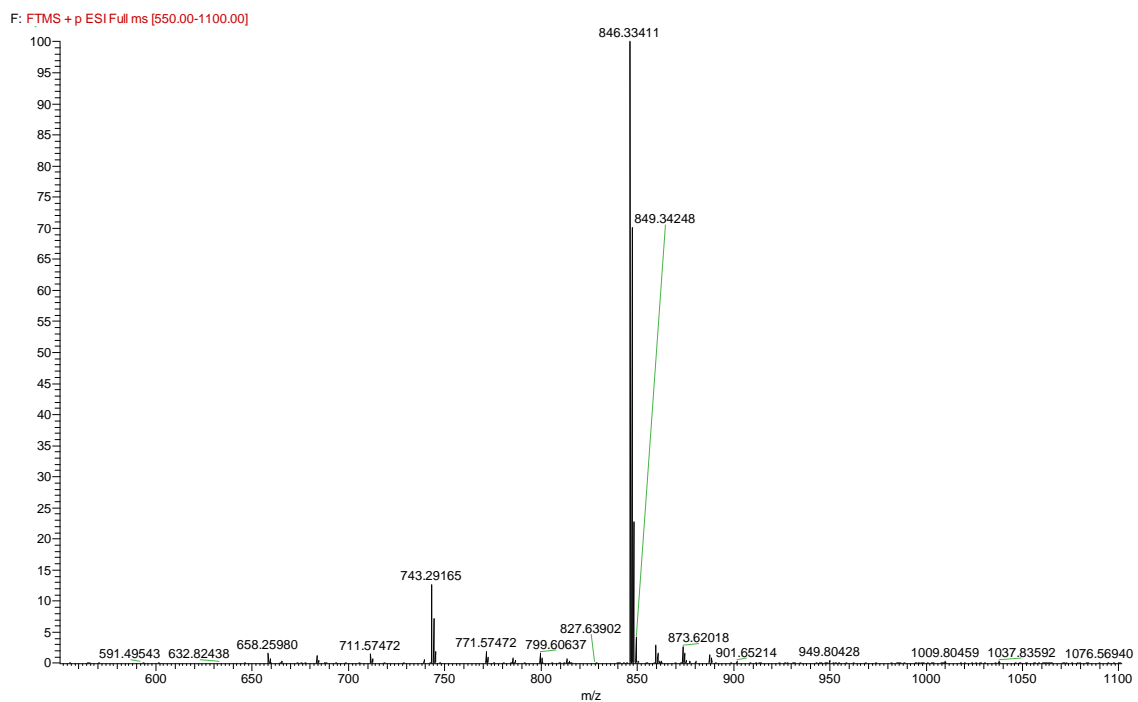

Figure S42. HRMS spectrum of compound **4**.

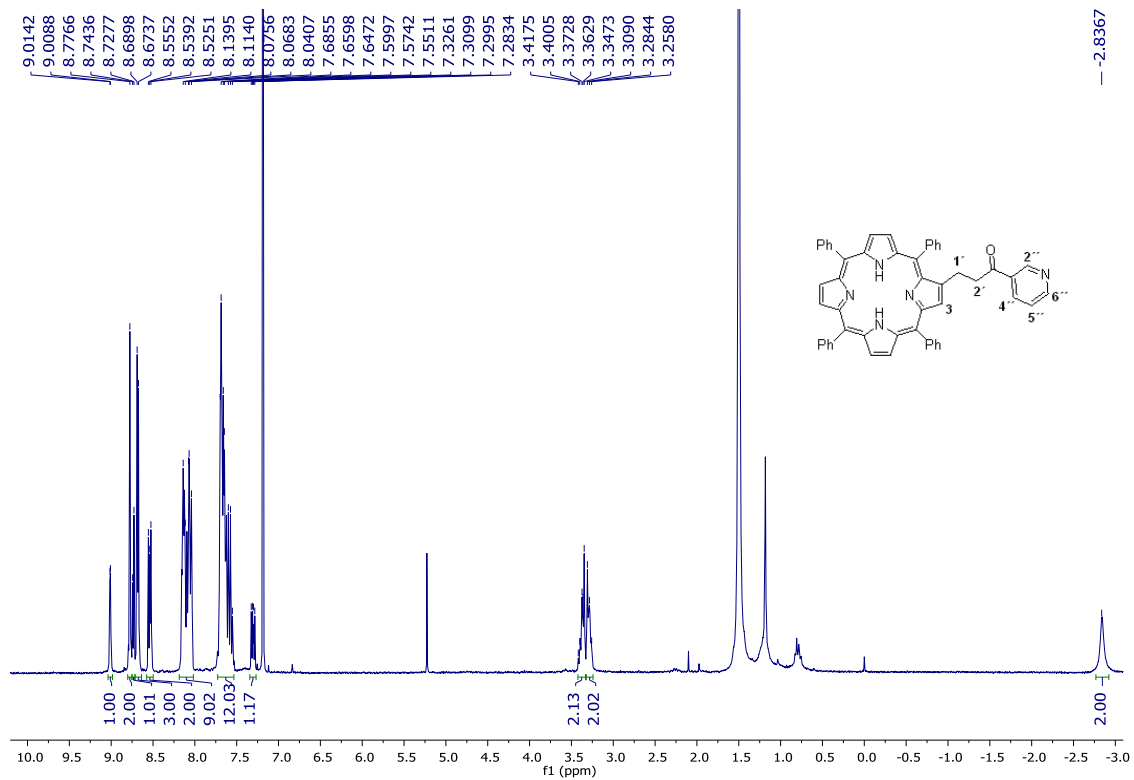

Figure S43. <sup>1</sup>H NMR spectrum of compound **5b** in CDCl<sub>3</sub>.

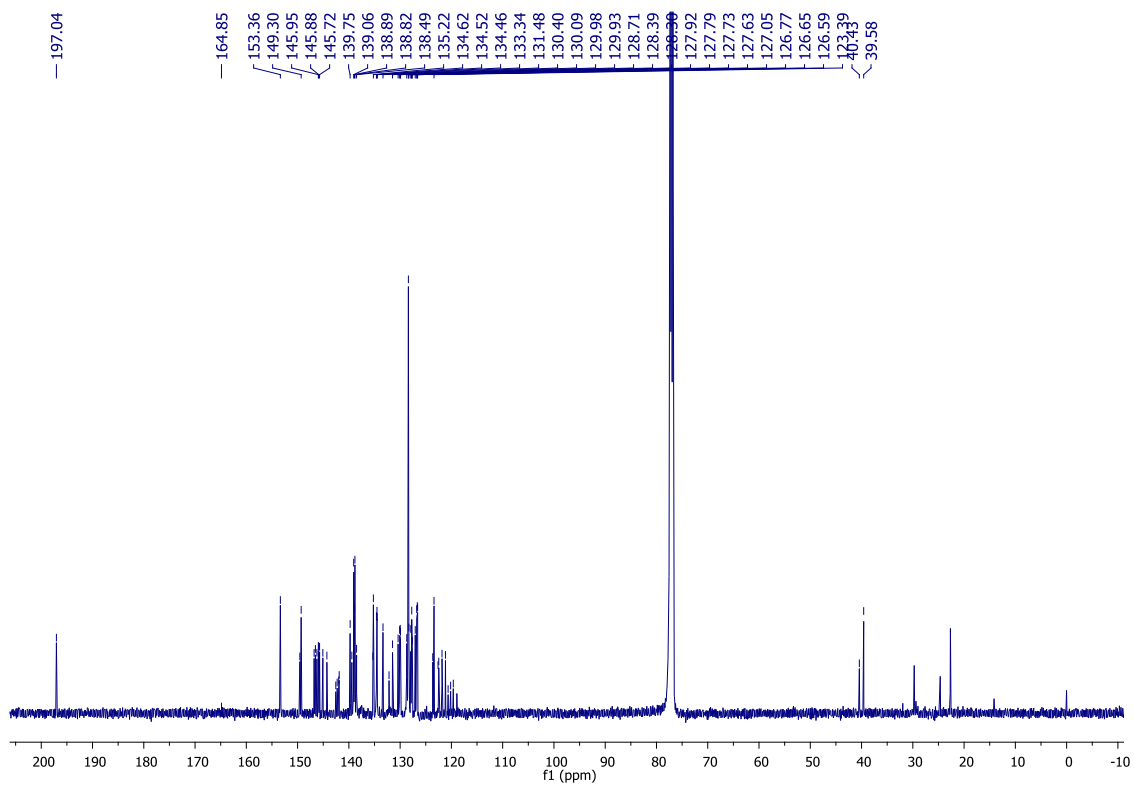

Figure S44. <sup>13</sup>C NMR spectrum of compound **5b** in CDCl<sub>3</sub>.

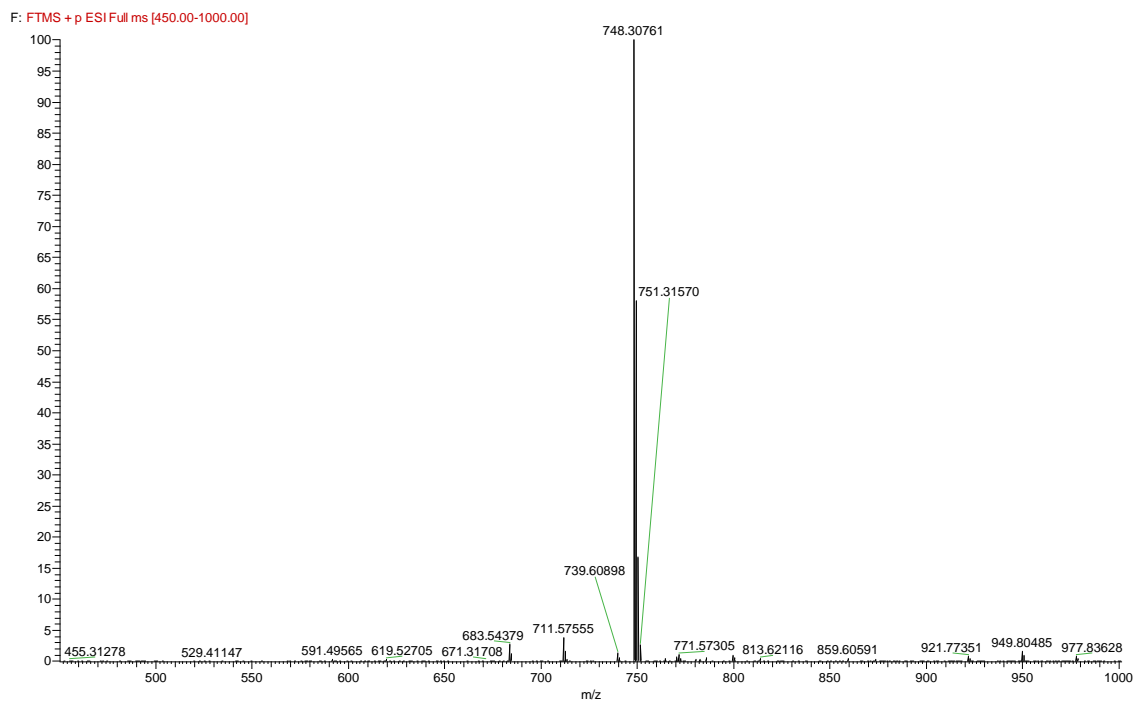

Figure S45. HRMS spectrum of compound **5b** in  $\text{CDCl}_3$ .

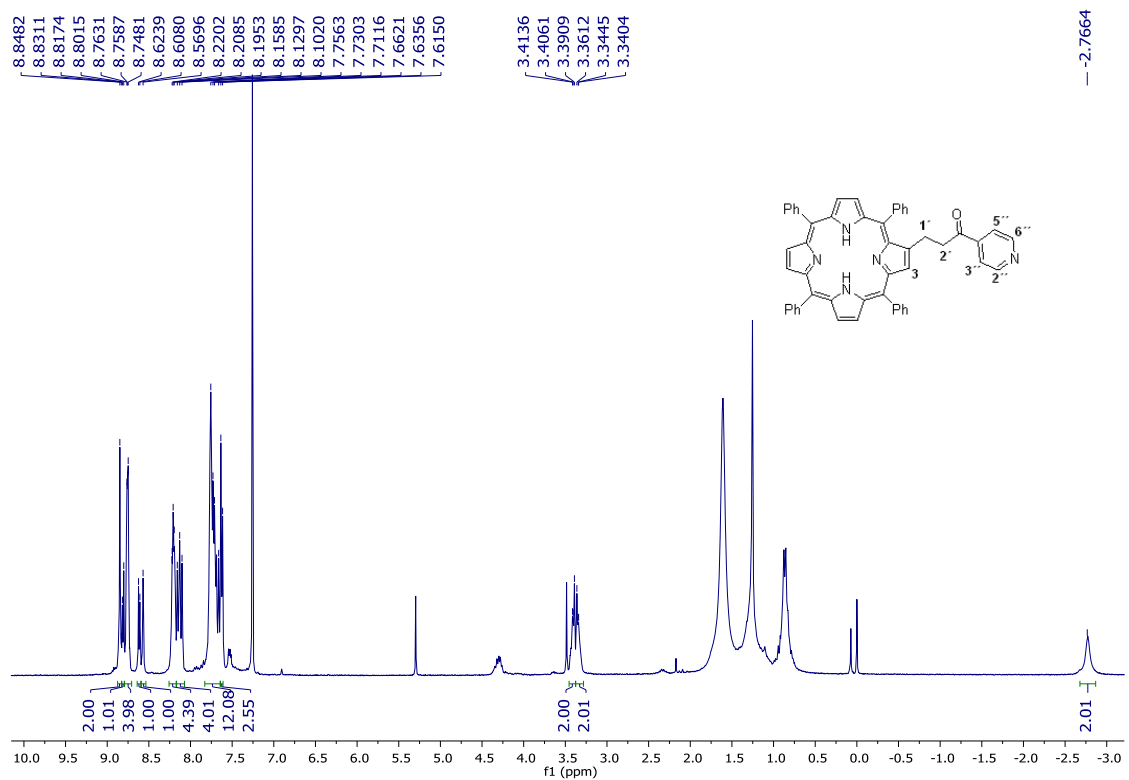

Figure S46.  $^1\text{H}$  NMR spectrum of compound **5c** in  $\text{CDCl}_3$ .

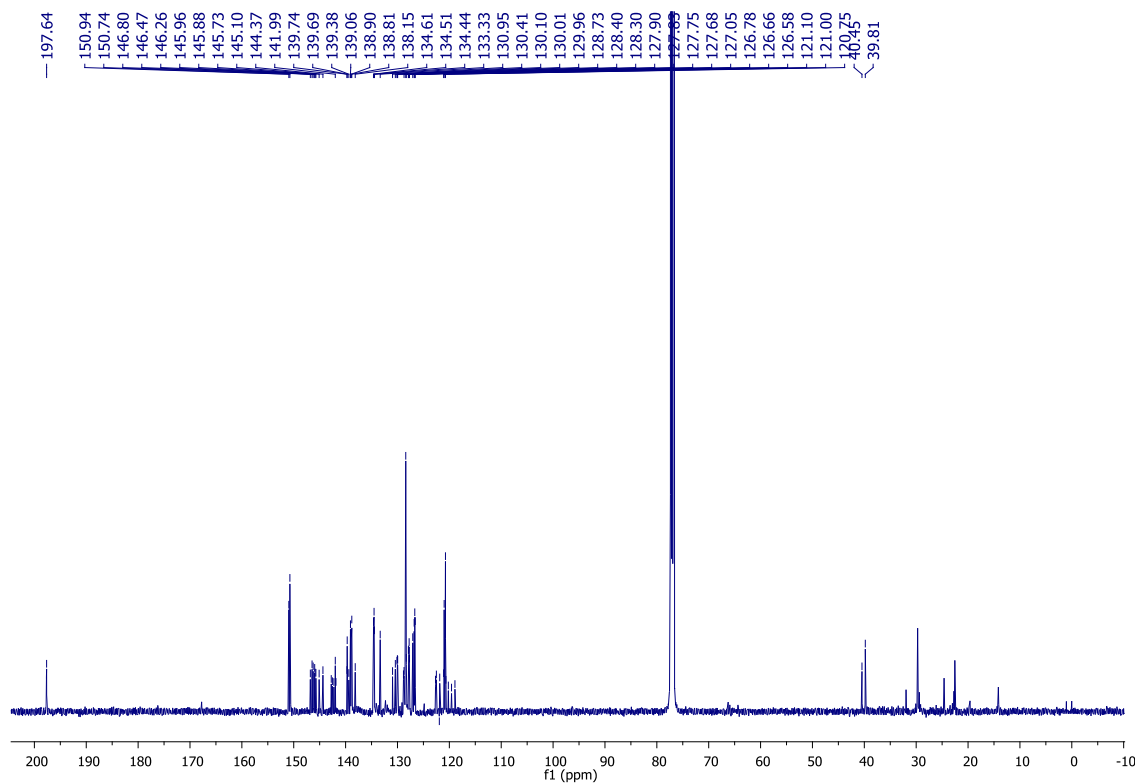

Figure S47.  $^{13}\text{C}$  NMR spectrum of compound **5c** in  $\text{CDCl}_3$ .

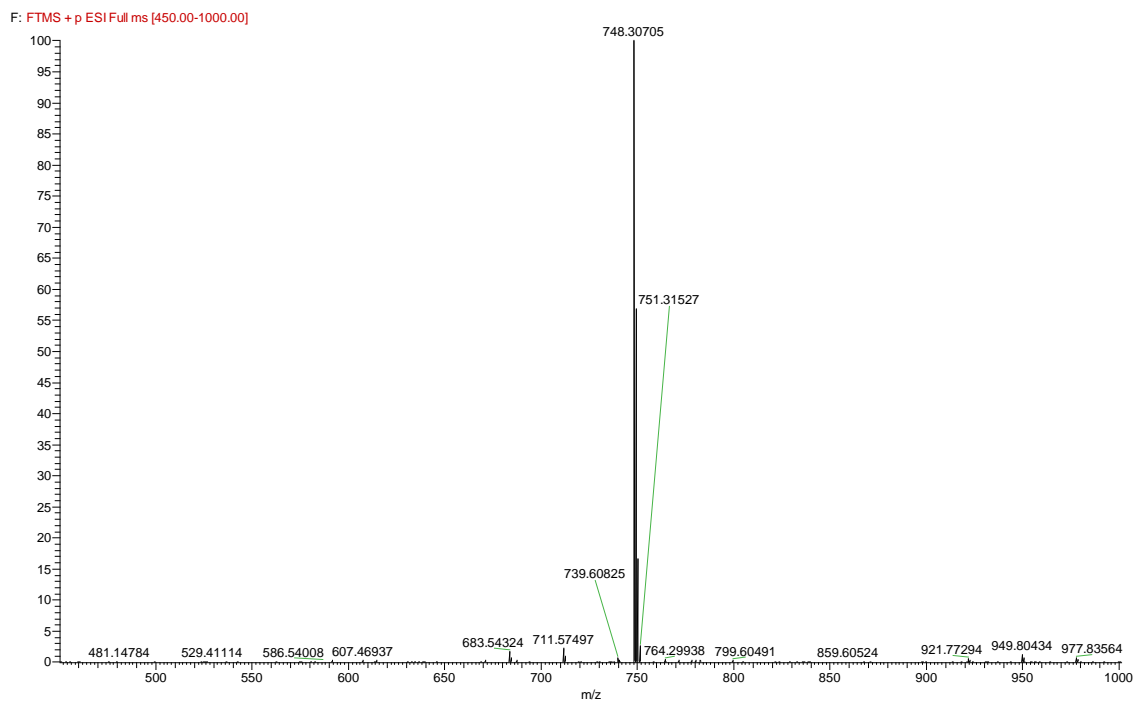

Figure S48. HRMS spectrum of compound **5c** in  $\text{CDCl}_3$ .

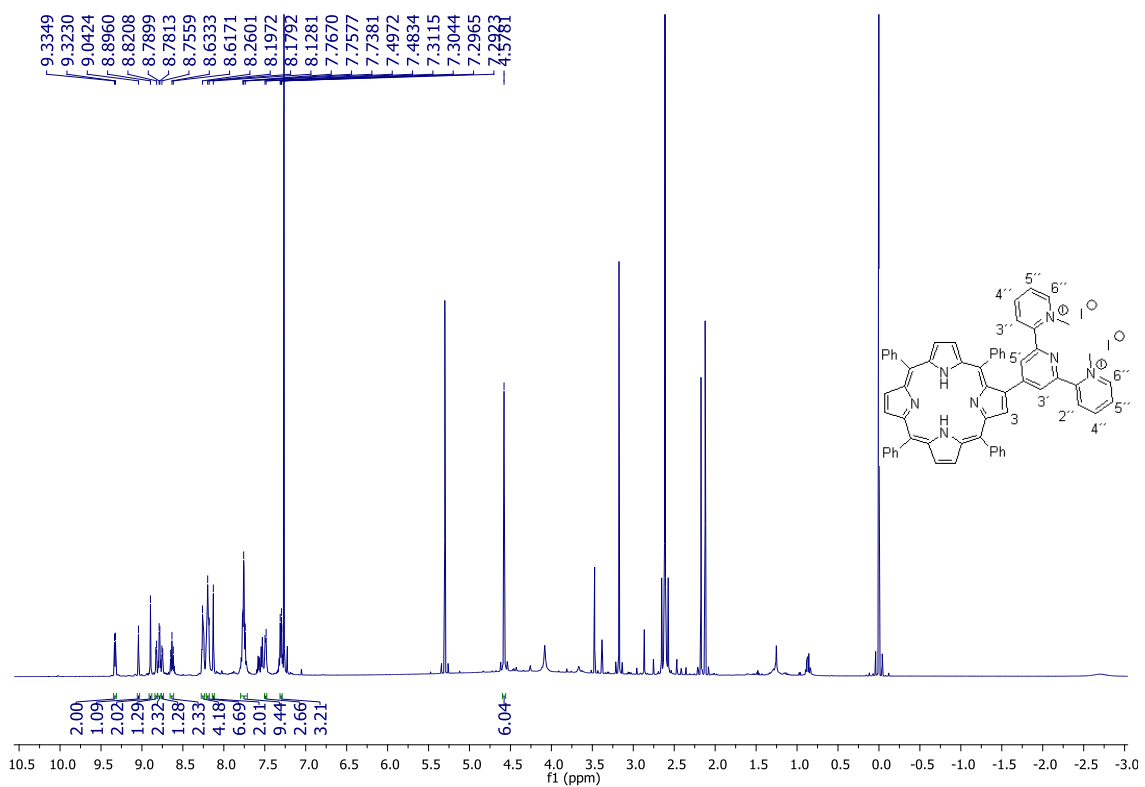

Figure S49.  $^1\text{H}$  NMR spectrum of compound **6a** in  $\text{CDCl}_3/\text{CD}_3\text{OD}$ .

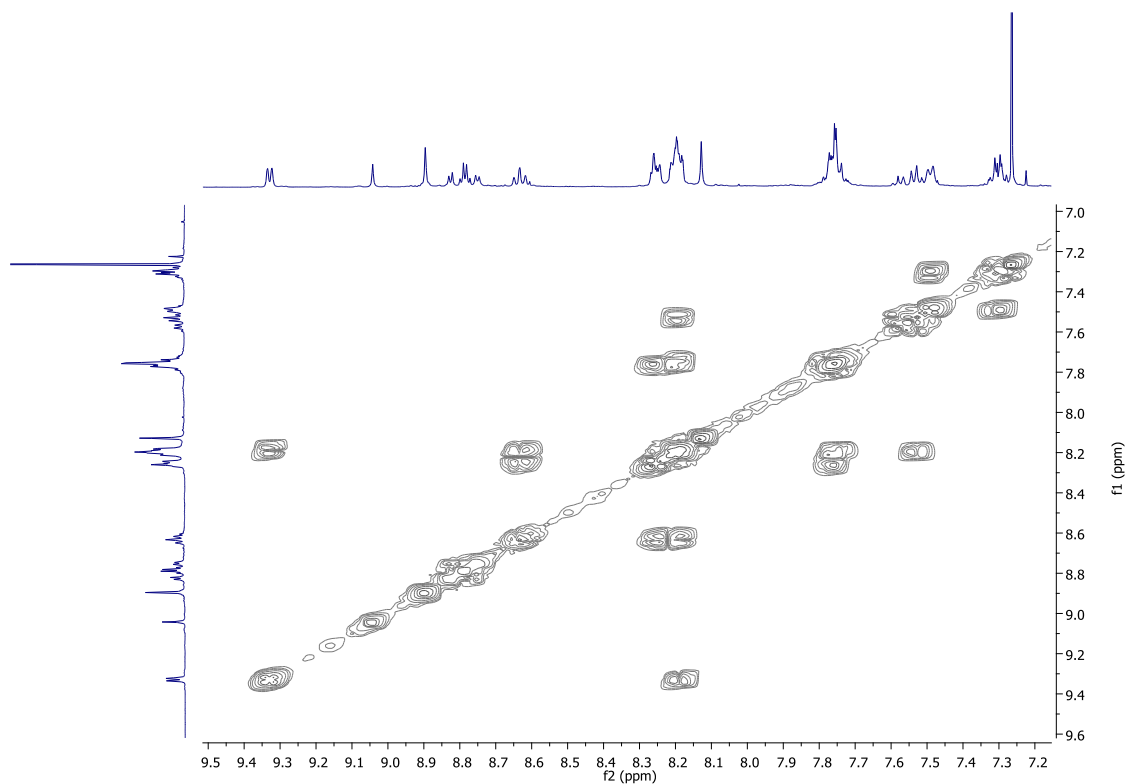

Figure S50. Partial COSY ( $^1\text{H}/^1\text{H}$ ) spectrum of compound **6a** in  $\text{CDCl}_3/\text{CD}_3\text{OD}$ .

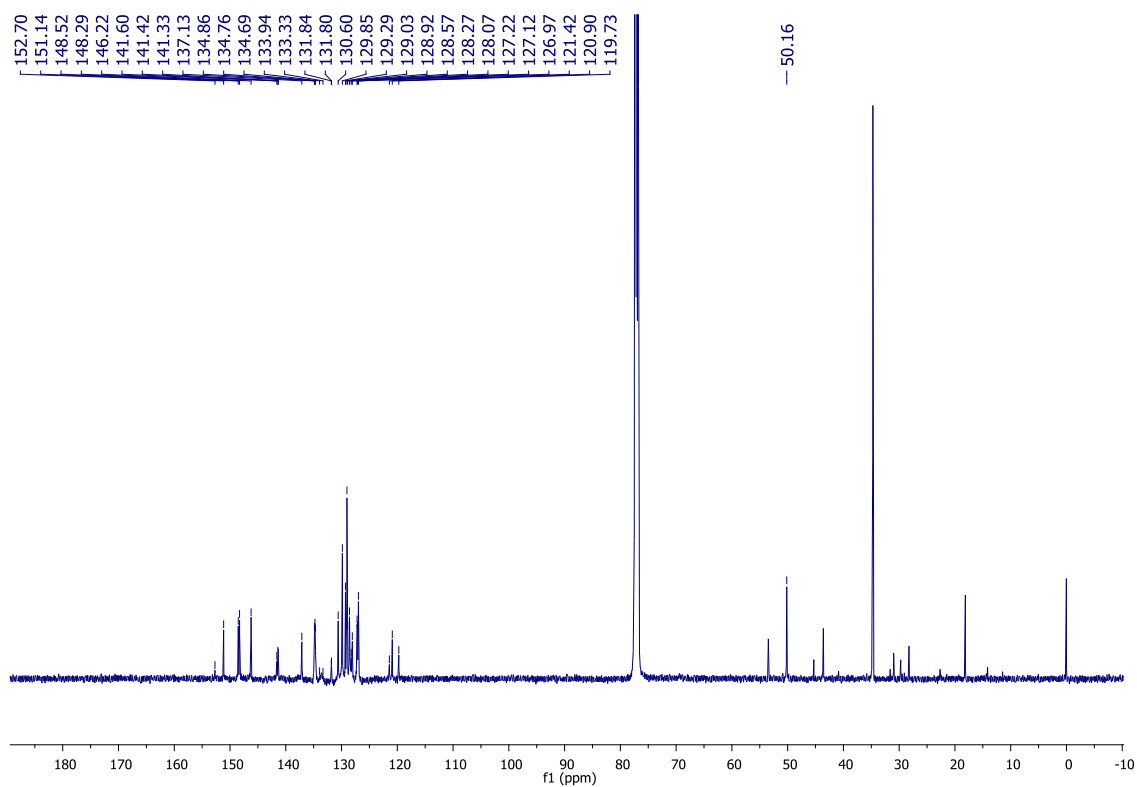

Figure S51.  $^{13}\text{C}$  NMR spectrum of compound **6a** in  $\text{CDCl}_3/\text{CD}_3\text{OD}$ .

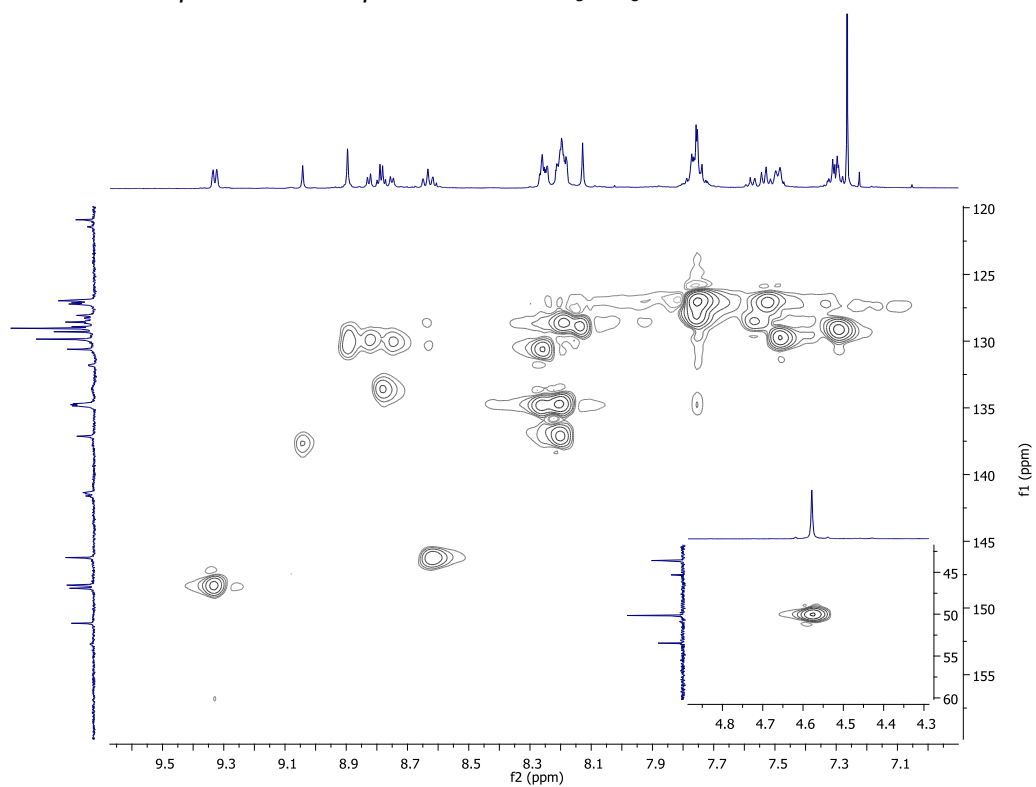

Figure S52. Partial HSQC ( $^1\text{H}/^{13}\text{C}$ ) spectrum of compound **6a** in  $\text{CDCl}_3/\text{CD}_3\text{OD}$ .

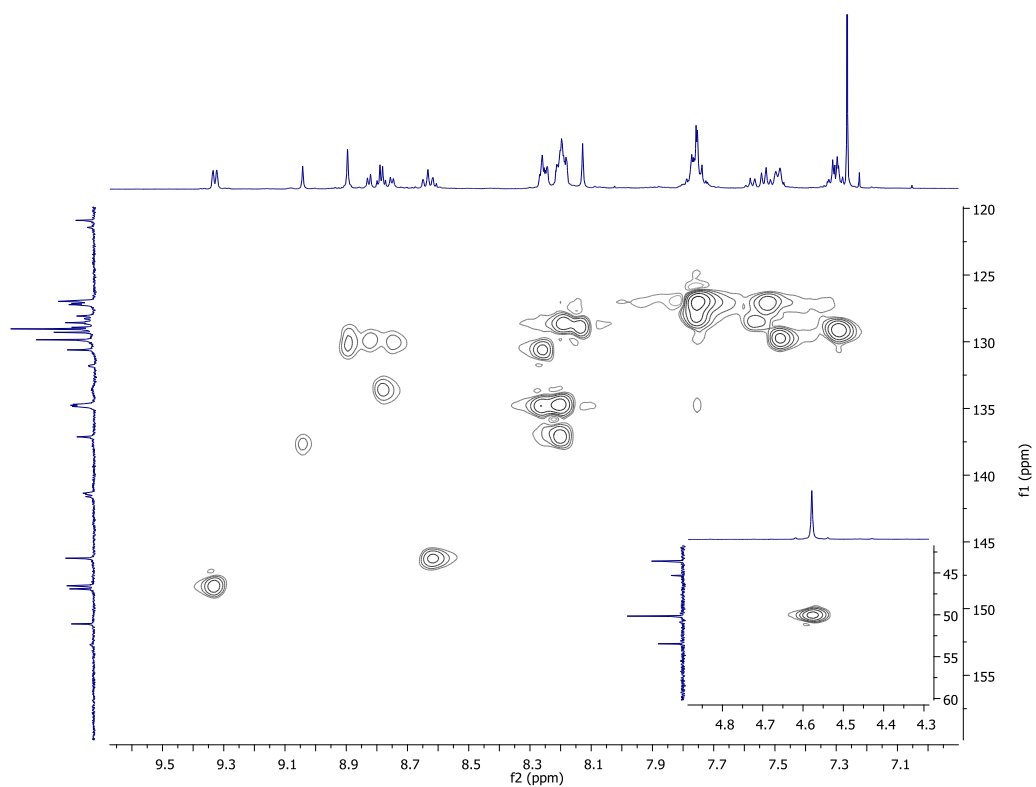

Figure S53. Partial HMBC ( $^1\text{H}/^{13}\text{C}$ ) spectrum of compound **6a** in  $\text{CDCl}_3/\text{CD}_3\text{OD}$ .

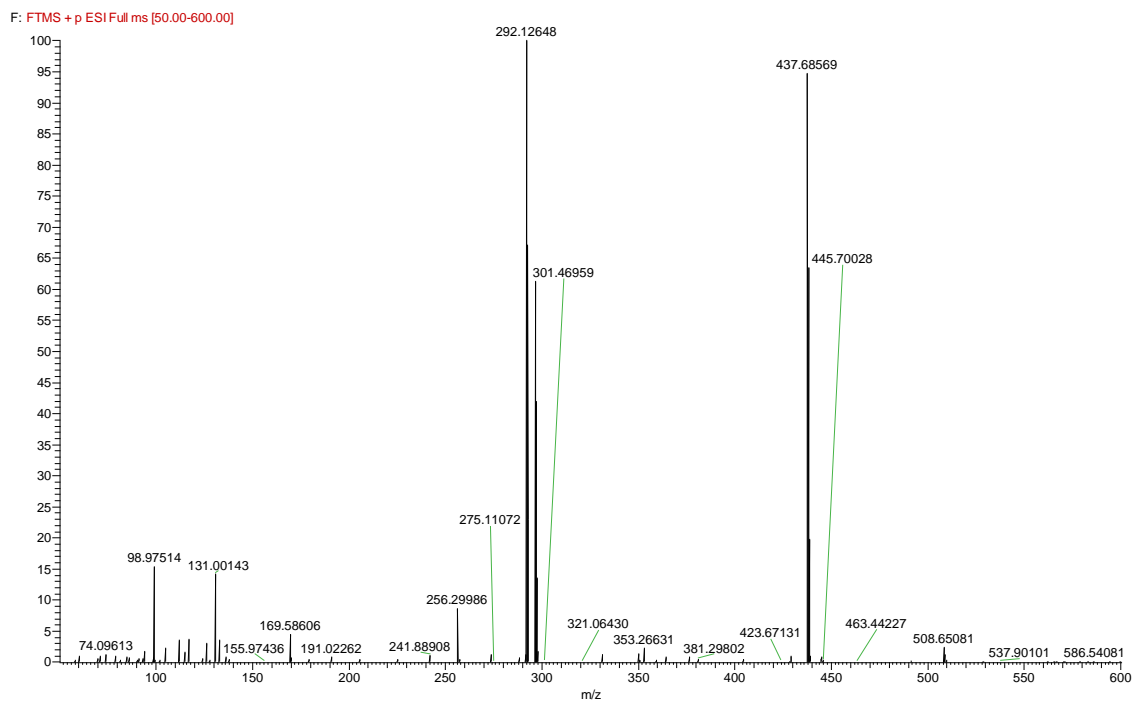

Figure S54. HRMS spectrum of compound **6a**.

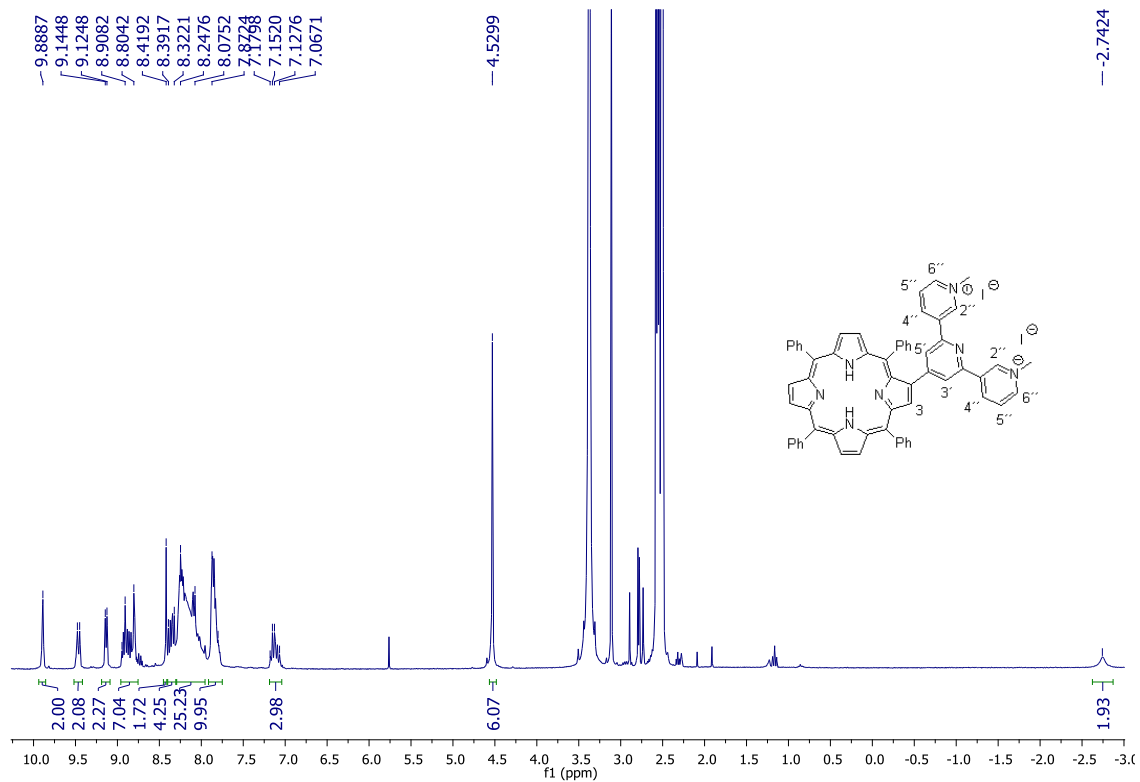

Figure S55. <sup>1</sup>H NMR spectrum of compound **6b** in DMSO-d<sub>6</sub>.

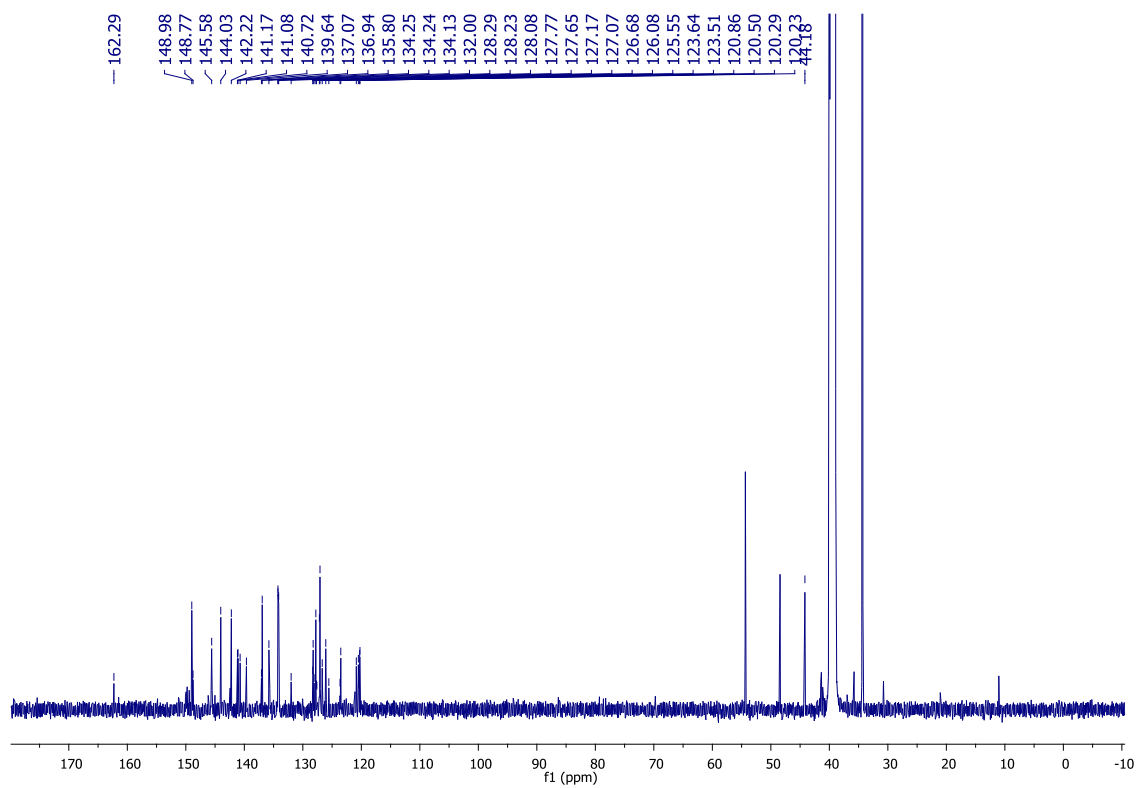

Figure S56. <sup>13</sup>C NMR spectrum of compound **6b** in DMSO-d<sub>6</sub>.



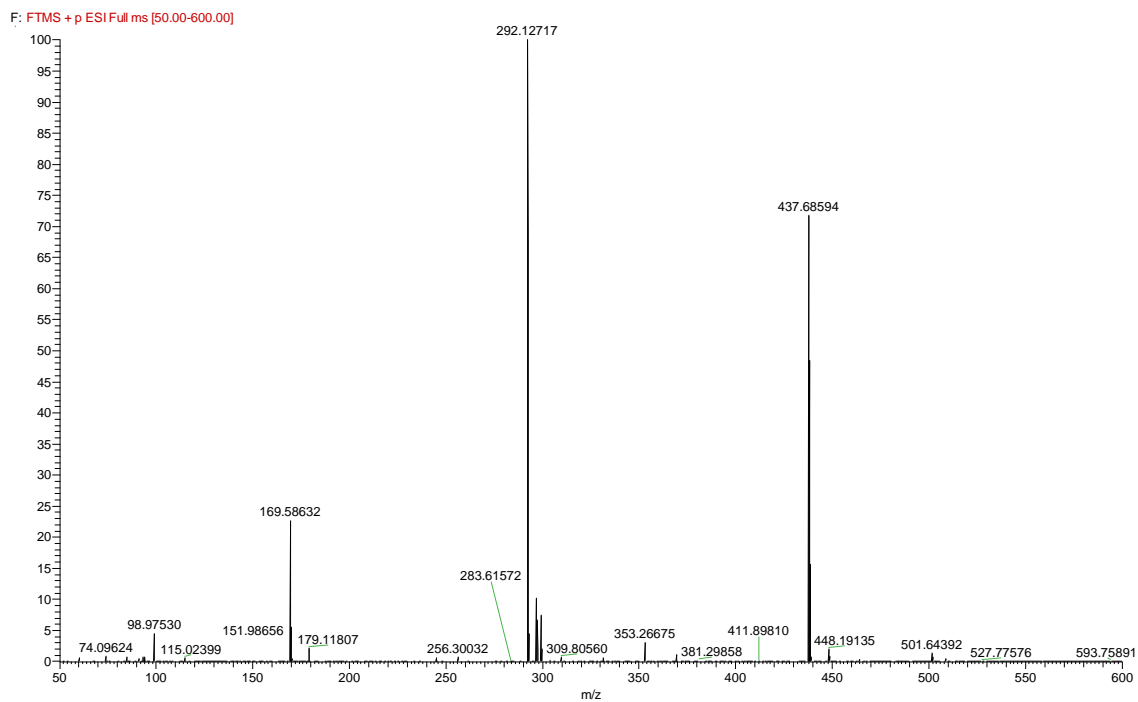

Figure S57. HRMS spectrum of compound **6b**.

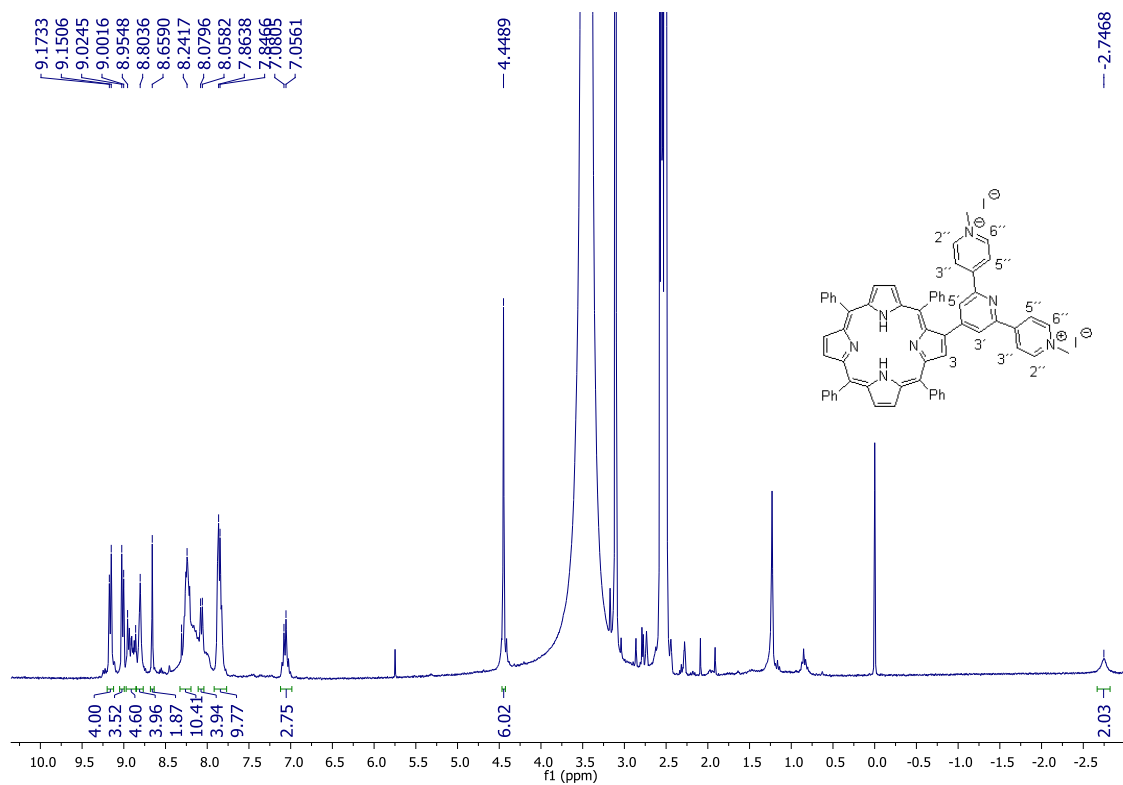

Figure S58.  $^1\text{H}$  NMR spectrum of compound **6c** in  $\text{DMSO-d}_6$ .

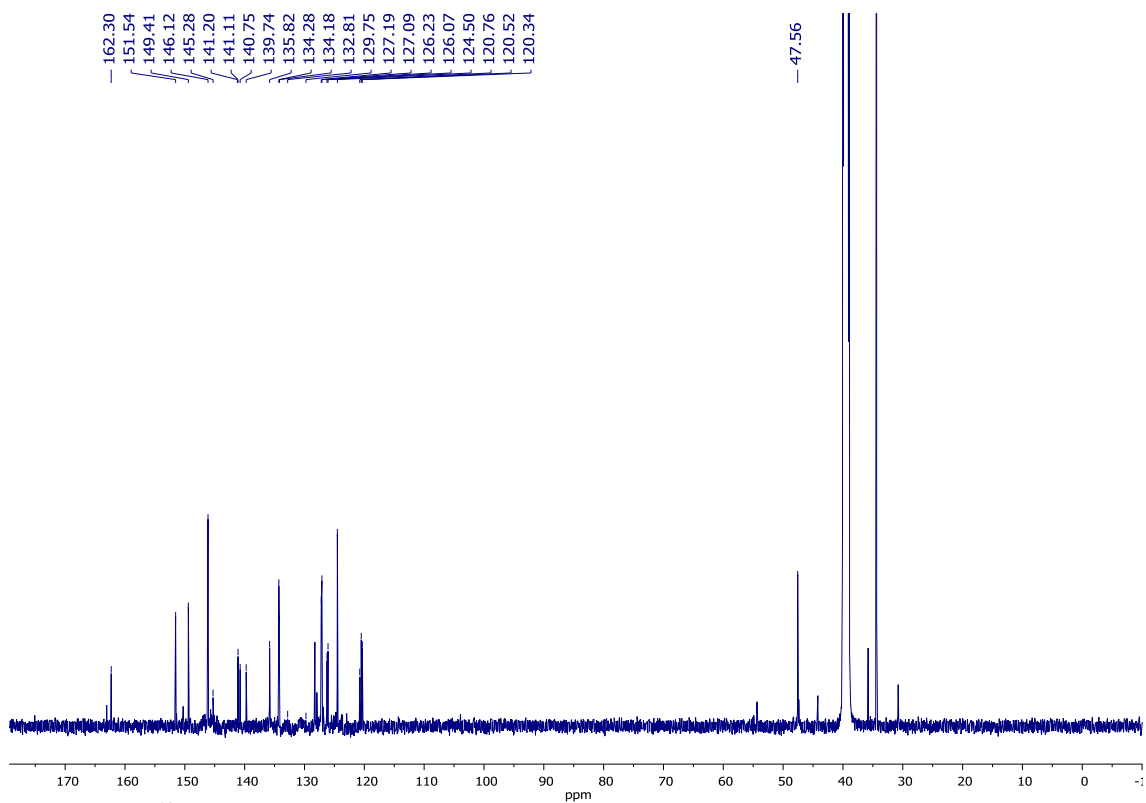

Figure S59.  $^{13}\text{C}$  NMR spectrum of compound **6c** in  $\text{DMSO-d}_6$ .

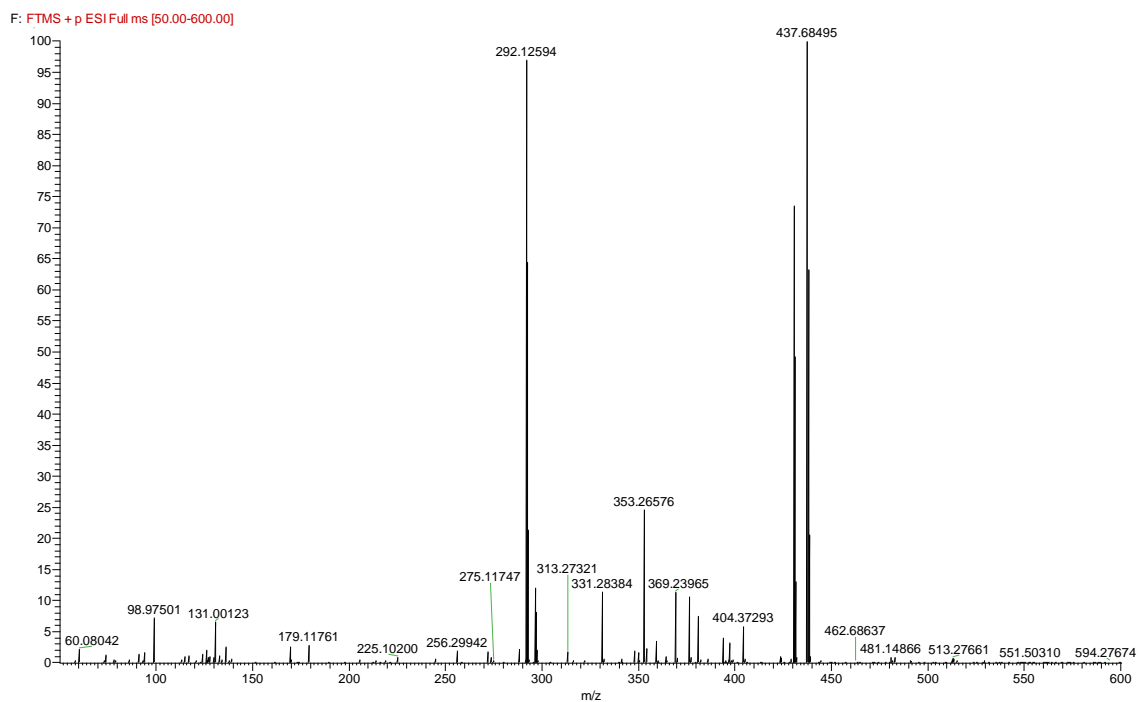

Figure S60. HRMS spectrum of compound **6c**.

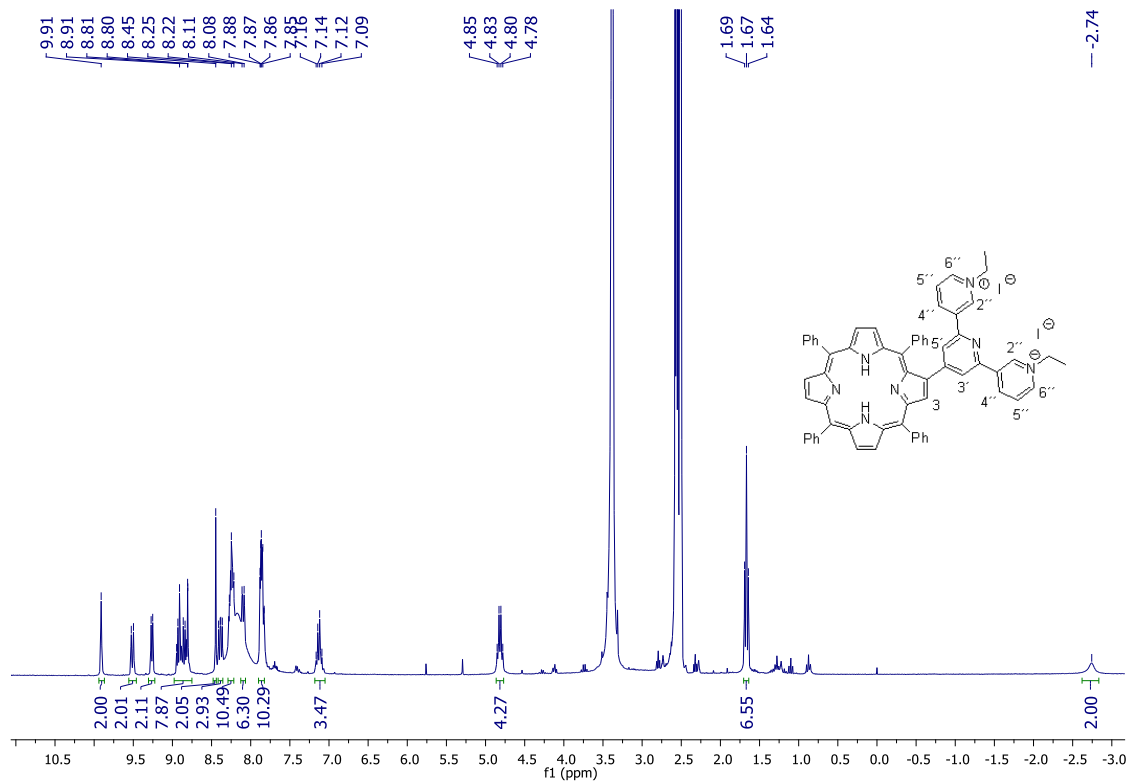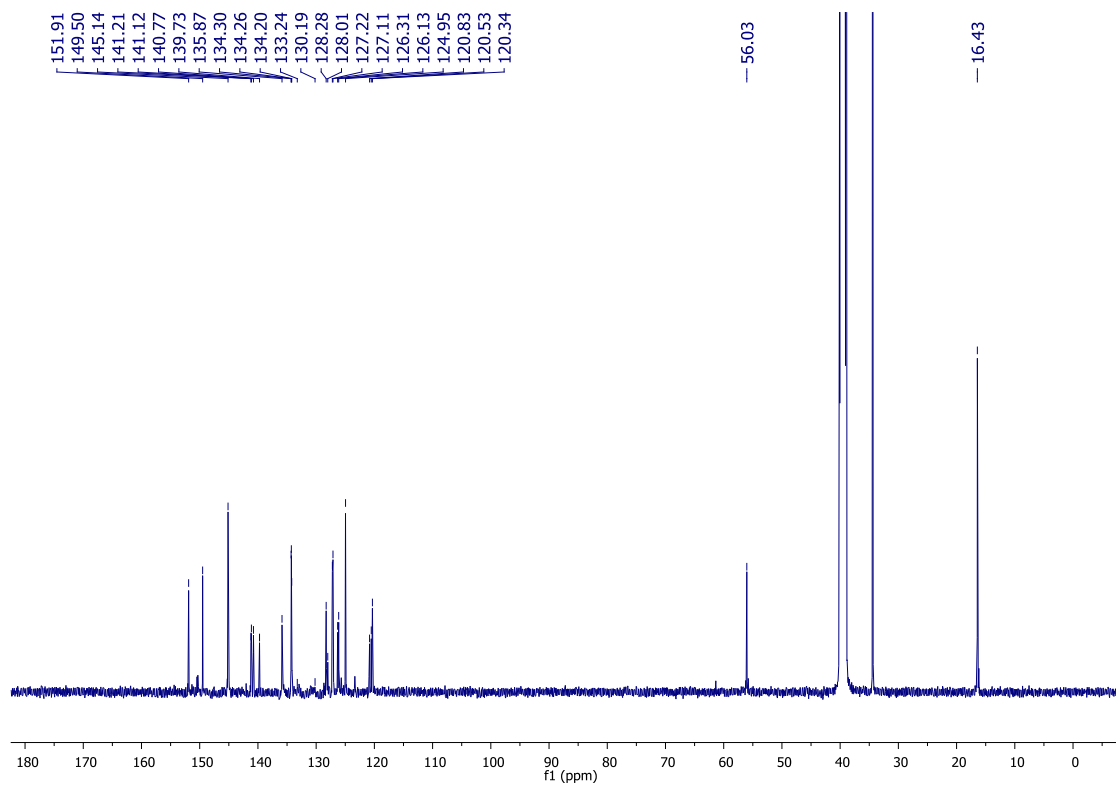

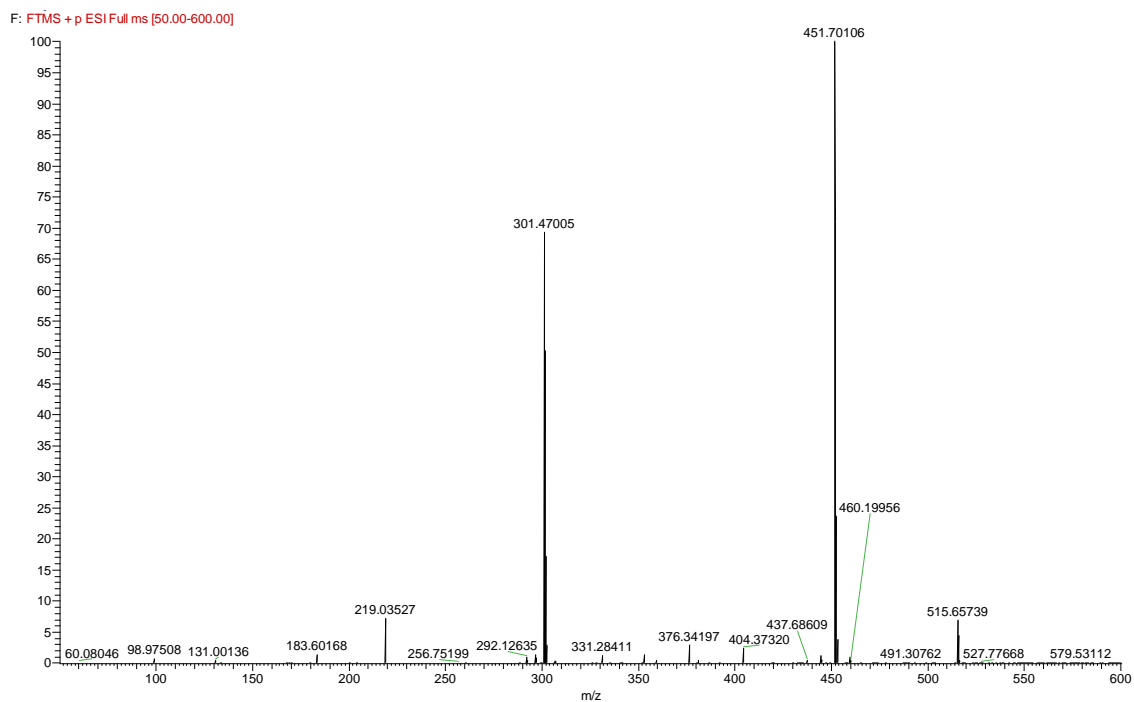

Figure S63. HRMS spectrum of compound **7b**.

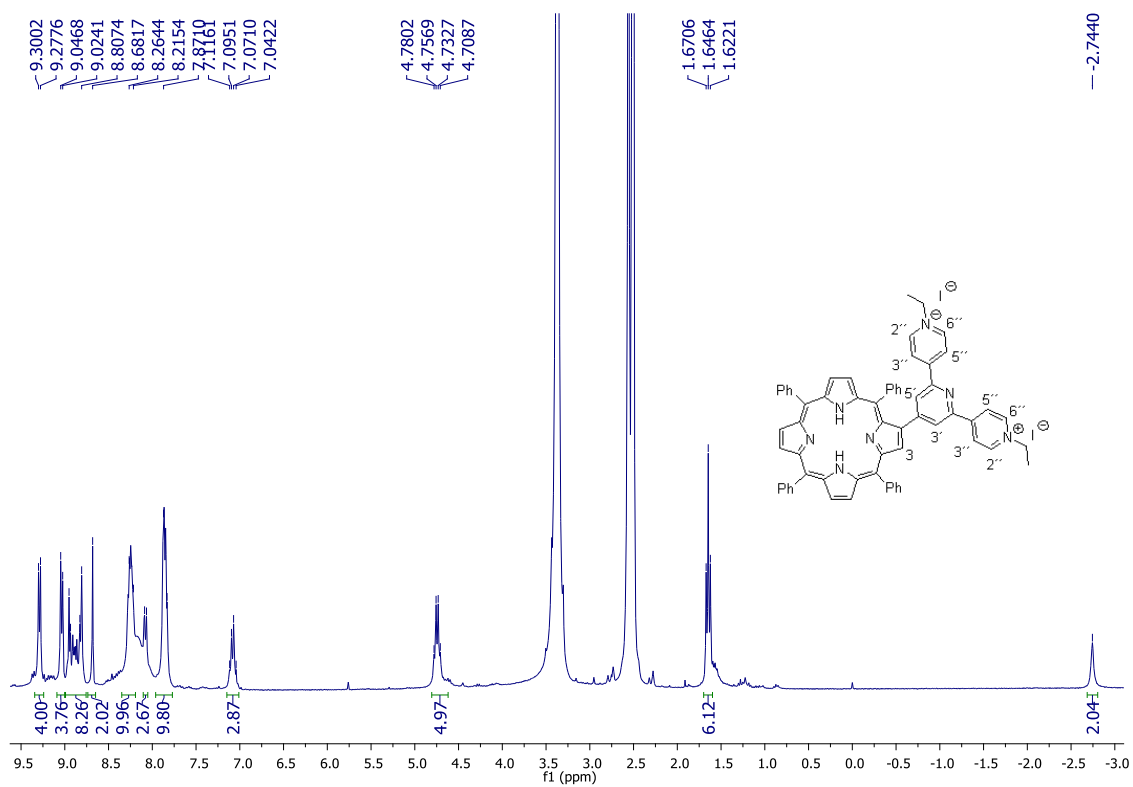

Figure S64.  $^1\text{H}$  NMR spectrum of compound **7c** in  $\text{DMSO-d}_6$ .

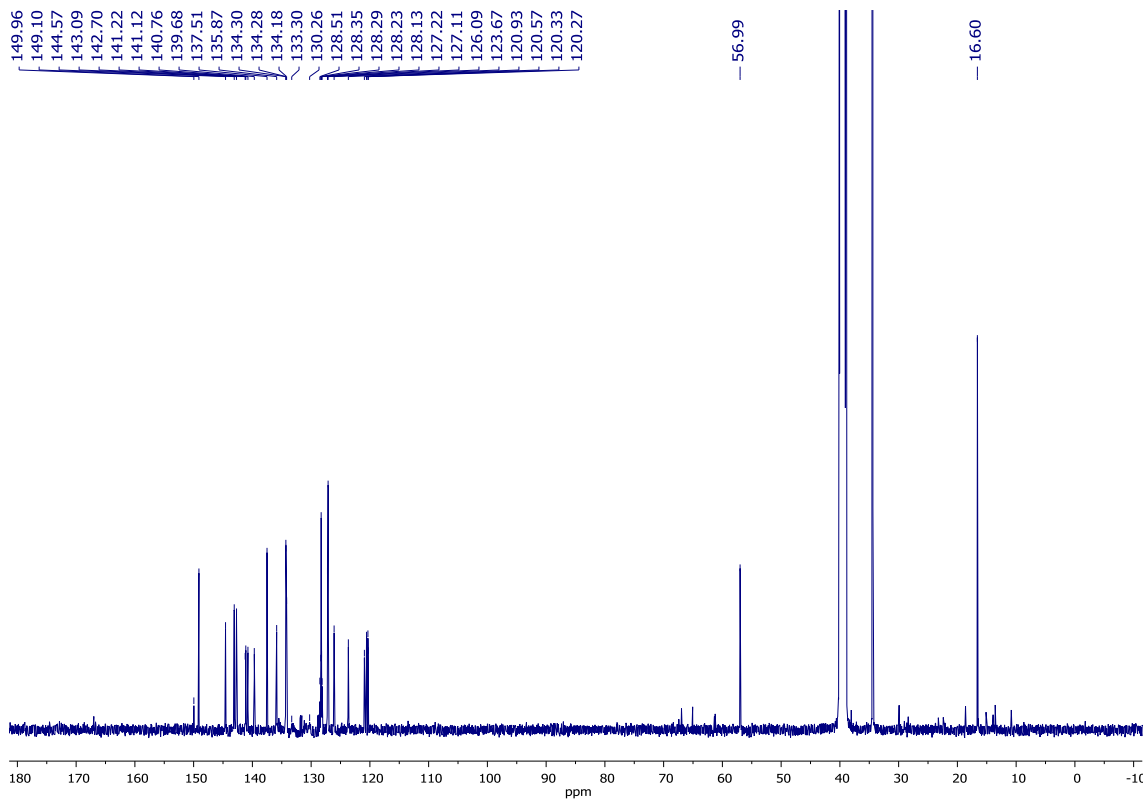

Figure S65.  $^{13}\text{C}$  NMR spectrum of compound **7c** in  $\text{DMSO-d}_6$ .

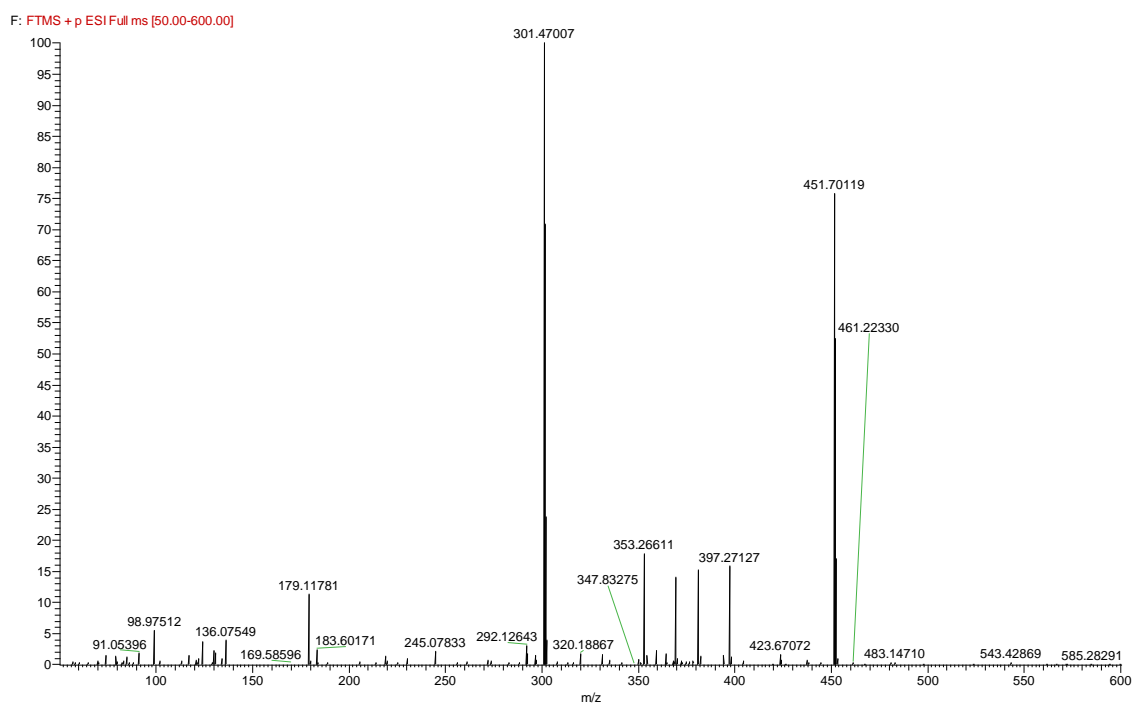

Figure S66. HRMS spectrum of compound **7c**.

### III – Biological assays

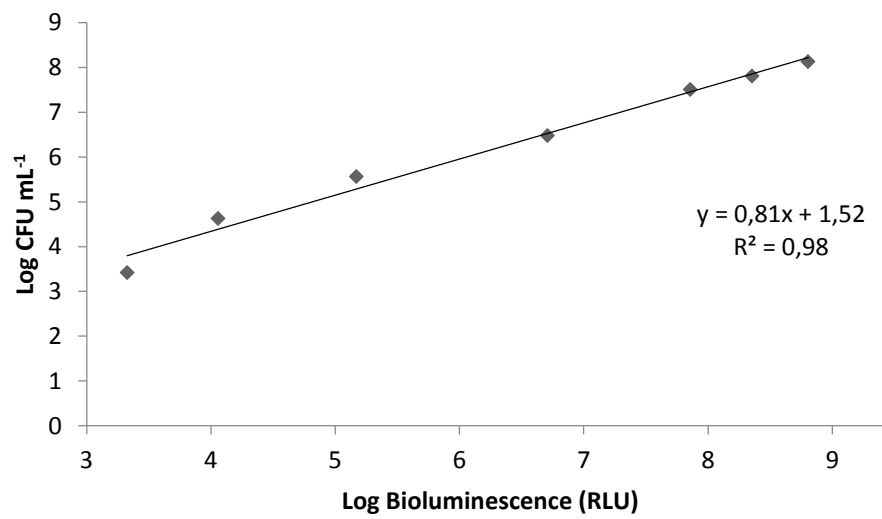

Figure S67. Relationship between bioluminescence and viable counts of overnight cultures of recombinant *E. coli* ( $\approx 10^8$  CFU mL<sup>-1</sup>) serially diluted in PBS. Bioluminescence is expressed in relative light units (RLU) and viable counts in CFU mL<sup>-1</sup>.
